# Supplementary material
Source: PubMed Central journal article supplement (PMC4424677)
Supplement: rsif20150024supp1.pdf [file rsif20150024supp1.pdf]

A Century of Transitions  
in New York City’s Measles Dynamics  
*Electronic Supplementary Material*

*Journal of the Royal Society Interface* (2015)

Karsten Hempel and David J.D. Earn

Department of Mathematics & Statistics, McMaster University,  
1280 Main Street West, Hamilton, Ontario, Canada, L8S 4K1

March 28, 2015

## Contents

|                                                                             |    |
|-----------------------------------------------------------------------------|----|
| S1 The Data                                                                 | 2  |
| S1.1 The Health Dept. Bulletins: 1891–1932 Weekly Data . . . . .            | 2  |
| S1.1.1 Disease Incidence, Volume 1: 1891–1914 . . . . .                     | 2  |
| S1.1.2 Vital Statistics, Volume 1: 1890–1899 . . . . .                      | 3  |
| S1.1.3 Vital Statistics, Volume 1: 1898 Change in Reporting Area . . . . .  | 3  |
| S1.1.4 Disease Incidence: 1915 . . . . .                                    | 4  |
| S1.1.5 Disease Incidence, Volume 2: 1916–1932 . . . . .                     | 5  |
| S1.1.6 Tabulation . . . . .                                                 | 5  |
| S1.2 Health Dept. Records 1958–1976 Weekly Disease Incidence Data . . . . . | 6  |
| S1.3 NYC Health Dept. Vital Statistics Reports: 1900–1984 . . . . .         | 6  |
| S1.4 1915 . . . . .                                                         | 6  |
| S1.5 Formatting the Data . . . . .                                          | 8  |
| S1.6 Summary of Available and Compiled Data . . . . .                       | 9  |
| S1.7 Normalized Data . . . . .                                              | 9  |
| S1.8 Consistency Checks . . . . .                                           | 10 |
| S2 Transient Periods in Wavelet Spectra                                     | 15 |
| S3 Sample Photographs from Data Sources                                     | 22 |
| References                                                                  | 31 |

# S1 The Data

Two data files that we compiled accompany this paper and can be downloaded from the web site of the *Journal of the Royal Society Interface* or from the International Infectious Disease Data Archive (IIDDA, <http://iidda.mcmaster.ca>).

## **meas\_us\_ny\_nyc\_1890–1984\_wk.csv**

Weekly measles cases in New York City (NYC).

## **vital\_us\_ny\_nyc\_1890–1984\_yr.csv**

Annual vital statistics in NYC (population, births, deaths, infant mortality, proportion vaccinated).

These datasets span 4 October 1890 to 30 December 1983, and were pieced together from four different sources.

## S1.1 The Health Dept. Bulletins: 1891–1932 Weekly Data

Near the end of the 19th century and in the first half of the 20th, the NYC Health Department published weekly bulletins containing information regarding a wide variety of public health related issues (see §S3 for sample photographs of such a bulletin). Some of the details provided in these bulletins were incidence rates for numerous infectious diseases, including measles. Spanning the years 1891–1932, the weekly bulletins were published in two volumes. We acquired access to these through the NYC Academy of Medicine Library <sup>1</sup>

As noted previously, vital statistics for the whole of NYC were acquired through the NYC Health Dept., which provides data going back to 1900 [2]. However, we require data going back to the beginning of measles incidence data in 1891. To fill in the missing years of 1891–1899, we extracted vital statistics from the health bulletins.

An important note must be made about these bulletins regarding their reporting area. The data tables in the bulletins provide data for only Manhattan Island up until 15 January 1898, after which the reporting area was enlarged to cover Manhattan, The Bronx, Brooklyn, Queens, and Richmond. We wish to retain as high consistency as possible between the reporting area of both measles incidence data and vital statistics. It is therefore advantageous to use disease incidence data and vital statistics from the same source, especially through a change in reporting area.

### S1.1.1 Disease Incidence, Volume 1: 1891–1914

City-wide reported cases of measles were extracted from a table as shown in Figure S1.

---

<sup>1</sup>The NYC Academy of Medicine [1] is a public institution independent of the NYC Health Department. Its library maintains a collection of books and literature related to health in the NYC population throughout its history.

| VOL. I.]                                                    |              | WEEK ENDING SATURDAY, 12 M., JANUARY 31, 1891. |             |             |             |            |             |             |             |                     |             | [No. 5.                     |             |             |  |  |
|-------------------------------------------------------------|--------------|------------------------------------------------|-------------|-------------|-------------|------------|-------------|-------------|-------------|---------------------|-------------|-----------------------------|-------------|-------------|--|--|
| Estimated Population, †1,660,348.                           |              |                                                |             |             |             |            |             |             |             | Death-rate, 28.16.  |             |                             |             |             |  |  |
| <i>Cases of Infectious and Contagious Disease Reported.</i> |              |                                                |             |             |             |            |             |             |             |                     |             |                             |             |             |  |  |
|                                                             | WEEK ENDING— |                                                |             |             |             |            |             |             |             |                     |             |                             |             |             |  |  |
|                                                             | Nov.<br>1.   | Nov.<br>8.                                     | Nov.<br>15. | Nov.<br>22. | Nov.<br>29. | Dec.<br>6. | Dec.<br>13. | Dec.<br>20. | Dec.<br>27. | Jan.<br>3,<br>1891. | Jan.<br>10. | Jan.<br>17.                 | Jan.<br>24. | Jan.<br>31. |  |  |
| Diphtheria.....                                             | 57           | 81                                             | 84          | 97          | 86          | 81         | 120         | 114         | 94          | 105                 | 95          | 90                          | 103         | 107         |  |  |
| Measles.....                                                | 108          | 131                                            | 133         | 141         | 236         | 238        | 269         | 319         | 253         | 298                 | 390         | 413                         | 453         | 433         |  |  |
| Scarlet Fever....                                           | 53           | 58                                             | 65          | 65          | 79          | 93         | 69          | 86          | 108         | 113                 | 154         | 134                         | 146         | 174         |  |  |
| Small-pox.....                                              | ...          | 1                                              | ...         | 1           | 1           | ...        | ...         | ...         | ...         | ...                 | ...         | ...                         | ...         | ...         |  |  |
| Typhoid Fever...                                            | 30           | 27                                             | 21          | 25          | 16          | 23         | 21          | 12          | 9           | 16                  | 8           | 7                           | 10          | 13          |  |  |
| Typhus Fever...                                             | ...          | ...                                            | ...         | ...         | ...         | 1          | ...         | ...         | ...         | ...                 | ...         | ...                         | ...         | ...         |  |  |
| <b>Total.....</b>                                           | <b>248</b>   | <b>298</b>                                     | <b>353</b>  | <b>329</b>  | <b>418</b>  | <b>436</b> | <b>479</b>  | <b>531</b>  | <b>464</b>  | <b>532</b>          | <b>647</b>  | <b>644</b>                  | <b>712</b>  | <b>727</b>  |  |  |
| Marriages reported.....                                     |              |                                                |             |             |             | 248        |             |             |             |                     |             | Burial permits issued.....  | 737         |             |  |  |
| Births.....                                                 |              |                                                |             |             |             | 849        |             |             |             |                     |             | Transit permits issued..... | 5           |             |  |  |
| Deaths.....                                                 |              |                                                |             |             |             | 737        |             |             |             |                     |             | Searches made.....          | 256         |             |  |  |
| Still-births.....                                           |              |                                                |             |             |             | 65         |             |             |             |                     |             | Transcripts issued.....     | 204         |             |  |  |

Figure S1: Health Bulletin table reporting weekly cases of infectious diseases. See §S3 for full page.

### S1.1.2 Vital Statistics, Volume 1: 1890–1899

Tables of the form shown in Figure S1 in volume 1 of the bulletins provide needed vital data where it could otherwise not be found.

### S1.1.3 Vital Statistics, Volume 1: 1898 Change in Reporting Area

The bulletin published for the week of Jan 15, 1898 was the first to include the larger reporting area mentioned previously. Vital statistics tables for that week and the one prior are shown in Figure S2 and Figure S3 to demonstrate the transition. Notice that though these consecutive bulletins occur in the same volume, their format changes to include data from the different boroughs.

| VIII.]                                                       |              | WEEK ENDING SATURDAY, 12 M., JANUARY 8, 1898. |             |             |            |             |                    |             |                             |             |             |             | [No. 1.          |            |  |
|--------------------------------------------------------------|--------------|-----------------------------------------------|-------------|-------------|------------|-------------|--------------------|-------------|-----------------------------|-------------|-------------|-------------|------------------|------------|--|
| Estimated Population, 12,020,986.                            |              |                                               |             |             |            |             | Death-rate, 19.88. |             |                             |             |             |             |                  |            |  |
| <i>Cases of Infectious and Contagious Diseases Reported.</i> |              |                                               |             |             |            |             |                    |             |                             |             |             |             |                  |            |  |
|                                                              | WEEK ENDING— |                                               |             |             |            |             |                    |             |                             |             |             |             |                  |            |  |
|                                                              | Oct.<br>9.   | Oct.<br>16.                                   | Oct.<br>23. | Oct.<br>30. | Nov.<br>6. | Nov.<br>13. | Nov.<br>20.        | Nov.<br>27. | Dec.<br>4.                  | Dec.<br>11. | Dec.<br>18. | Dec.<br>25. | Jan.<br>1, 1898. | Jan.<br>8. |  |
| Phthisis .....                                               | 213          | 190                                           | 191         | 178         | 194        | 202         | 225                | 167         | 181                         | 198         | 175         | 201         | 133              | 133        |  |
| Diphtheria.....                                              | 131          | 116                                           | 112         | 124         | 115        | 102         | 129                | 163         | 164                         | 139         | 155         | 143         | 147              | 145        |  |
| Croup.....                                                   | 8            | 4                                             | 2           | 1           | 1          | 6           | 4                  | 8           | 2                           | 7           | 4           | 6           | 2                | 6          |  |
| Measles.....                                                 | 63           | 90                                            | 104         | 149         | 189        | 172         | 246                | 228         | 269                         | 298         | 305         | 287         | 266              | 379        |  |
| Scarlet Fever....                                            | 83           | 109                                           | 95          | 107         | 119        | 120         | 152                | 127         | 121                         | 164         | 212         | 160         | 183              | 218        |  |
| Small-pox.....                                               | ..           | ..                                            | ..          | ..          | ..         | ..          | ..                 | ..          | ..                          | ..          | ..          | 1           | ..               | 1          |  |
| Typhoid Fever...                                             | 54           | 50                                            | 40          | 37          | 28         | 30          | 26                 | 38          | 46                          | 61          | 34          | 27          | 17               | 19         |  |
| Typhus Fever...                                              | ..           | ..                                            | ..          | ..          | ..         | ..          | ..                 | ..          | ..                          | ..          | ..          | ..          | ..               | ..         |  |
| Total.....                                                   | 552          | 559                                           | 544         | 596         | 646        | 632         | 782                | 731         | 783                         | 867         | 885         | 825         | 748              | 919        |  |
| Marriages reported.....                                      |              |                                               |             |             | 461        |             |                    |             | Burial permits issued.....  |             |             |             | 770              |            |  |
| Births .....                                                 |              |                                               |             |             | 1,170      |             |                    |             | Transit permits issued..... |             |             |             | 10               |            |  |
| Deaths .....                                                 |              |                                               |             |             | 770        |             |                    |             | Searches made.....          |             |             |             | 269              |            |  |
| Still-births .....                                           |              |                                               |             |             | 76         |             |                    |             | Transcripts issued.....     |             |             |             | 266              |            |  |

Figure S2: Health Bulletin table reporting vital statistics for only Manhattan Island, week of Jan. 8, 1898.

| VOL. VIII.]       |                                     | WEEK ENDING SATURDAY, 12 M., JANUARY 15, 1898. |                      |            |               |                           | [No. 2. |
|-------------------|-------------------------------------|------------------------------------------------|----------------------|------------|---------------|---------------------------|---------|
| BOROUGH.          | ESTIMATED POPULATION, JULY 1, 1898. | DEATHS.                                        | BIRTHS.              | MARRIAGES. | STILL-BIRTHS. | DEATH-RATE.               |         |
| Manhattan.....    | 1,911,755<br><del>2,889,126</del>   | 653                                            | 1,080                | 350        | 74            | 17.82<br><del>18.08</del> |         |
| The Bronx.....    | 137,122<br><del>132,226</del>       | 61                                             | 76                   | 10         | 5             | 22.55<br>23.22            |         |
| Brooklyn.....     | 1,197,100                           | 382                                            | 483                  | 103        | 38            | 16.65                     |         |
| Queens.....       | 128,042                             |                                                | Not fully organized. |            |               |                           |         |
| Richmond.....     | 64,927                              | 13                                             | 11                   | 3          | 3             | 24.10                     |         |
| City of New York. | 3,438,899                           | ....                                           | ....                 | ....       | ..            | .....                     |         |

Figure S3: Health Bulletin table reporting vital statistics for Manhattan, The Bronx, Brooklyn, Queens, and Richmond, week of Jan 15, 1898. The handwritten corrections are uncommon in these documents; they are the result of Health Dept. reorganization.

#### S1.1.4 Disease Incidence: 1915

Sometime between 1914 and 1916, the NYC Health Dept. adjusted the form of its bulletins, and the transitional year, 1915, presents some difficulty. Figure S4 shows the only available data tables regarding cases of reportable infectious diseases found for that year.



| Infectious and Contagious Diseases in Hospital. |                          |             |          |         |        |                     |             |          |               |         |                         |                |             |          |            |                       |         |        |
|-------------------------------------------------|--------------------------|-------------|----------|---------|--------|---------------------|-------------|----------|---------------|---------|-------------------------|----------------|-------------|----------|------------|-----------------------|---------|--------|
|                                                 | Willard Parker Hospital. |             |          |         |        | Riverside Hospital. |             |          |               |         | Kingston Ave. Hospital. |                |             |          |            | Otisville Sanatorium. |         |        |
|                                                 | Scarlet Fever.           | Diphtheria. | Measles. | Miscel. | Total. | Scarlet Fever.      | Diphtheria. | Measles. | Tuberculosis. | Miscel. | Total.                  | Scarlet Fever. | Diphtheria. | Measles. | Small-pox. |                       | Miscel. | Total. |
| Remaining Feb. 13, 1915                         | 216                      | 115         | 47       | 10      | 388    | 44                  | 49          | 26       | 237           | 1       | 357                     | 145            | 76          | 24       | ..         | 26                    | 271     | 559    |
| Admitted.....                                   | 40                       | 46          | 24       | 1       | 111    | 6                   | 11          | 11       | 16            | ..      | 44                      | 28             | 35          | 2        | ..         | 10                    | 75      | 19     |
| Discharged.....                                 | 48                       | 27          | 21       | 3       | 99     | 14                  | 19          | 15       | 1             | ..      | 49                      | 20             | 29          | 8        | ..         | 14                    | 71      | 15     |
| Died.....                                       | 2                        | 7           | 2        | 2       | 13     | ..                  | 3           | 1        | 7             | ..      | 11                      | 4              | 6           | ..       | ..         | ..                    | 10      | 1      |
| Remaining Feb. 20, 1915                         | 266                      | 127         | 48       | 6       | 387    | 36                  | 38          | 21       | 245           | 1       | 341                     | 149            | 76          | 18       | ..         | 22                    | 265     | 562    |
| Total treated....                               | 256                      | 161         | 71       | 11      | 499    | 50                  | 60          | 37       | 253           | 1       | 401                     | 173            | 111         | 26       | ..         | 36                    | 346     | 578    |

Figure S4: Health Bulletin table showing reportable infectious diseases, week of Feb. 20, 1915. See §S3 for full page.

Notice that city-wide totals of cases are not reported. Instead measles cases are reported only for three hospitals within the city. These numbers are themselves not representative of the entire city, but fortunately we can re-scale them using an independent data source (see §S1.4).

### S1.1.5 Disease Incidence, Volume 2: 1916–1932

The format of the tables from which disease incidence data were drawn changed slightly compared to the previous volume, and tables appeared as shown in Figure S5.

| Cases of Infectious and Contagious Diseases Reported. |        |         |         |         |        |         |         |         |        |        |         |         |         |
|-------------------------------------------------------|--------|---------|---------|---------|--------|---------|---------|---------|--------|--------|---------|---------|---------|
| Week Ending                                           | Feb. 5 | Feb. 12 | Feb. 19 | Feb. 26 | Mar. 4 | Mar. 11 | Mar. 18 | Mar. 25 | Apr. 1 | Apr. 8 | Apr. 15 | Apr. 22 | Apr. 29 |
| Tuberculosis.....                                     | 428    | 388     | 428     | 378     | 546    | 456     | 351     | 364     | 385    | 415    | 466     | 409     | 450     |
| Diphtheria and Croup.                                 | 372    | 328     | 391     | 300     | 316    | 342     | 364     | 347     | 312    | 304    | 373     | 313     | 302     |
| Measles.....                                          | 345    | 308     | 559     | 503     | 527    | 576     | 696     | 772     | 939    | 932    | 1,045   | 1,019   | 1,095   |
| Scarlet Fever.....                                    | 188    | 154     | 175     | 173     | 179    | 190     | 208     | 226     | 234    | 194    | 214     | 224     | 177     |
| Chickenpox.....                                       | 171    | 220     | 194     | 208     | 273    | 259     | 304     | 320     | 398    | 430    | 440     | 279     | 404     |
| Typhus Fever.....                                     | ..     | ..      | ..      | ..      | ..     | ..      | ..      | 1       | ..     | 1      | ..      | ..      | ..      |
| Typhoid Fever.....                                    | 18     | 13      | 21      | 10      | 18     | 12      | 17      | 17      | 20     | 20     | 34      | 82      | 13      |
| Whooping Cough.....                                   | 104    | 121     | 112     | 143     | 166    | 180     | 169     | 203     | 245    | 268    | 270     | 259     | 280     |
| Syphilis.....                                         | 382    | 309     | 350     | 363     | 425    | 305     | 350     | 330     | 547    | 391    | 373     | 372     | 439     |
| Gonorrhoea.....                                       | 134    | 100     | 141     | 90      | 178    | 64      | 76      | 73      | 330    | 65     | 108     | 93      | 249     |

Figure S5: Health Bulletin table reporting weekly cases of infectious diseases. See §S3 for full page.

### S1.1.6 Tabulation

For the tables containing disease incidence rates in volumes 1 and 2, notice that for each week's bulletin, a full quarter-year of previous weeks' worth of reported cases are shown. This means that in order to extract a year's worth of data, no more than five sample bulletins are required. As a result, we did not photograph

all Weekly Bulletin pages, but instead sampled pages periodically such that completely overlapping disease incidence tables were acquired.

Notice that the table providing vital statistics shows only information for the week in question. For the total population of NYC at the time, this did not present a problem; weekly changes in population are not significant compared to the total population, we can therefore estimate a yearly average population from these numbers. Birth rates oscillate throughout the year [8], and so for years in which a full set of bulletin photographs had not been acquired, we use weekly data points available periodically throughout the year to estimate the yearly value.

## S1.2 Health Dept. Records 1958–1976 Weekly Disease Incidence Data

The NYC Health Department kept detailed records of the incidence of many diseases and conditions, including infectious diseases of interest to us. In particular, from 1958–1976, weekly records were kept of the incidence of diseases and conditions by health district of residence, of which there are 27 in NYC (this date range represents only what we were able to find, but all indications suggest that such data were collected for a wider range of dates). These are organized by boroughs and city-wide totals are available for our purposes. See Figure S6 for a sample table providing city-wide totals, and §S3 for a sample of a full weekly report.

## S1.3 NYC Health Dept. Vital Statistics Reports: 1900–1984

The NYC Health Dept. website has made historical vital statistics reports available to the general public [2]. These reports, for the years of 1976–1984, contain tables showing city-wide monthly aggregated cases of reportable diseases. For years outside of this range and going back to 1935, yearly aggregated data is provided in the reports we obtained. For disease incidence, yearly data is by no means sufficient for our purposes. However, these vital statistics reports, as the name would imply, contain population and vital statistics data, for which yearly numbers are adequate. Furthermore, 5-year estimates are reported from 1900–1935.

## S1.4 1915

We noted previously that we must further discuss the Weekly Bulletin data for the year 1915. Disease incidence numbers prior to 1915 come from Volume 1 of the Health Bulletins, and after 1915 come from Volume 2, as noted previously. The data before and after 1915 represent measles cases for all of NYC, whereas the data we have for 1915 represent counts taken for only three hospitals within the city. Using yearly aggregated reported measles cases taken from the NYC Vital Statistics Reports [2] and comparing them with yearly totals from the Health Bulletin data (see Figure S10), we determine a scaling factor (5.04) with which to adjust the weekly Health Bulletin Data. Figure S7 shows measles incidence rates recorded for the years surrounding 1915 before we re-sale the 1915 data. We conclude from the apparent consistency in the pattern of outbreaks that the adjustment is appropriate.

CITY OF NEW YORK REPORTABLE DISEASES AND CONDITIONS  
 BY BOROUGH OF RESIDENCE  
 WEEK ENDING JAN 8 1960

TENTATIVE, CORRECTED TO DATE. NOT TO BE USED FOR ANNUAL COMPILATION

|                  | TOTAL | MAN. | BX. | BKLYN | QNS. | RICH. | MILITARY |
|------------------|-------|------|-----|-------|------|-------|----------|
| AMERIASIS        | 6     | 3    | 3   |       |      |       |          |
| BACIL DYSENTERY  |       |      |     |       |      |       |          |
| BRUCELLOSIS      |       |      |     |       |      |       |          |
| CHICKENPOX       | 154   | 25   | 27  | 78    | 20   | 4     |          |
| DIARRHEA NEWBORN |       |      |     |       |      |       |          |
| DIPHTHERIA       |       |      |     |       |      |       |          |
| ENCEPHALITIS     |       |      |     |       |      |       |          |
| GERMAN MEASLES   | 33    | 15   | 5   | 11    | 1    | 1     |          |
| HEPATITIS        |       |      |     |       |      |       |          |
| MEASLES          | 423   | 148  | 60  | 212   | 3    |       |          |
| MENINGITIS       |       |      |     |       |      |       |          |
| MENINGOCOCCAL    |       |      |     |       |      |       |          |
| OTH BAC MYCOTIC  |       |      |     |       |      |       |          |
| ASEPTIC          |       |      |     |       |      |       |          |
| MUMPS            | 139   | 45   | 31  | 33    | 28   | 1     | 1        |
| POISONINGS       |       |      |     |       |      |       |          |
| DRUGS CHEM       | 246   | 79   | 39  | 64    | 50   | 14    |          |
| FOOD GROUPS      |       |      |     |       |      |       |          |
| GAS              | 7     |      |     | 6     | 1    |       |          |
| LEAD             | 3     | 1    |     | 2     |      |       |          |
| POLIOMYELITIS    |       |      |     |       |      |       |          |
| PARALYTIC        |       |      |     |       |      |       |          |
| NONPARALYTIC     |       |      |     |       |      |       |          |
| UNSPECIFIED      |       |      |     |       |      |       |          |
| PSITTACOSIS      |       |      |     |       |      |       |          |
| RICKETTSIALPOX   |       |      |     |       |      |       |          |
| SALMONELLOSIS    |       |      |     |       |      |       |          |
| SCARLET FEVER    | 32    | 4    | 4   | 17    | 6    | 1     |          |
| SCHISTOSOMIASIS  | 4     | 2    | 1   | 1     |      |       |          |
| STREP THROAT     |       |      |     |       |      |       |          |
| TETANUS          |       |      |     |       |      |       |          |
| THRUSH NEWBORN   |       |      |     |       |      |       |          |
| TRICHINOSIS      |       |      |     |       |      |       |          |
| TYPHOID FEVER    |       |      |     |       |      |       |          |
| WHOOPING COUGH   | 23    | 4    | 3   | 15    | 1    |       |          |

LIBRARY  
 JAN 12 1960  
 OF MEDICINE  
 N.Y. ACADEMY

Figure S6: NYC Health Dept. table showing reportable diseases and conditions. See §S3 for full weekly report.



## NYC Monthly Measles 1910–1920

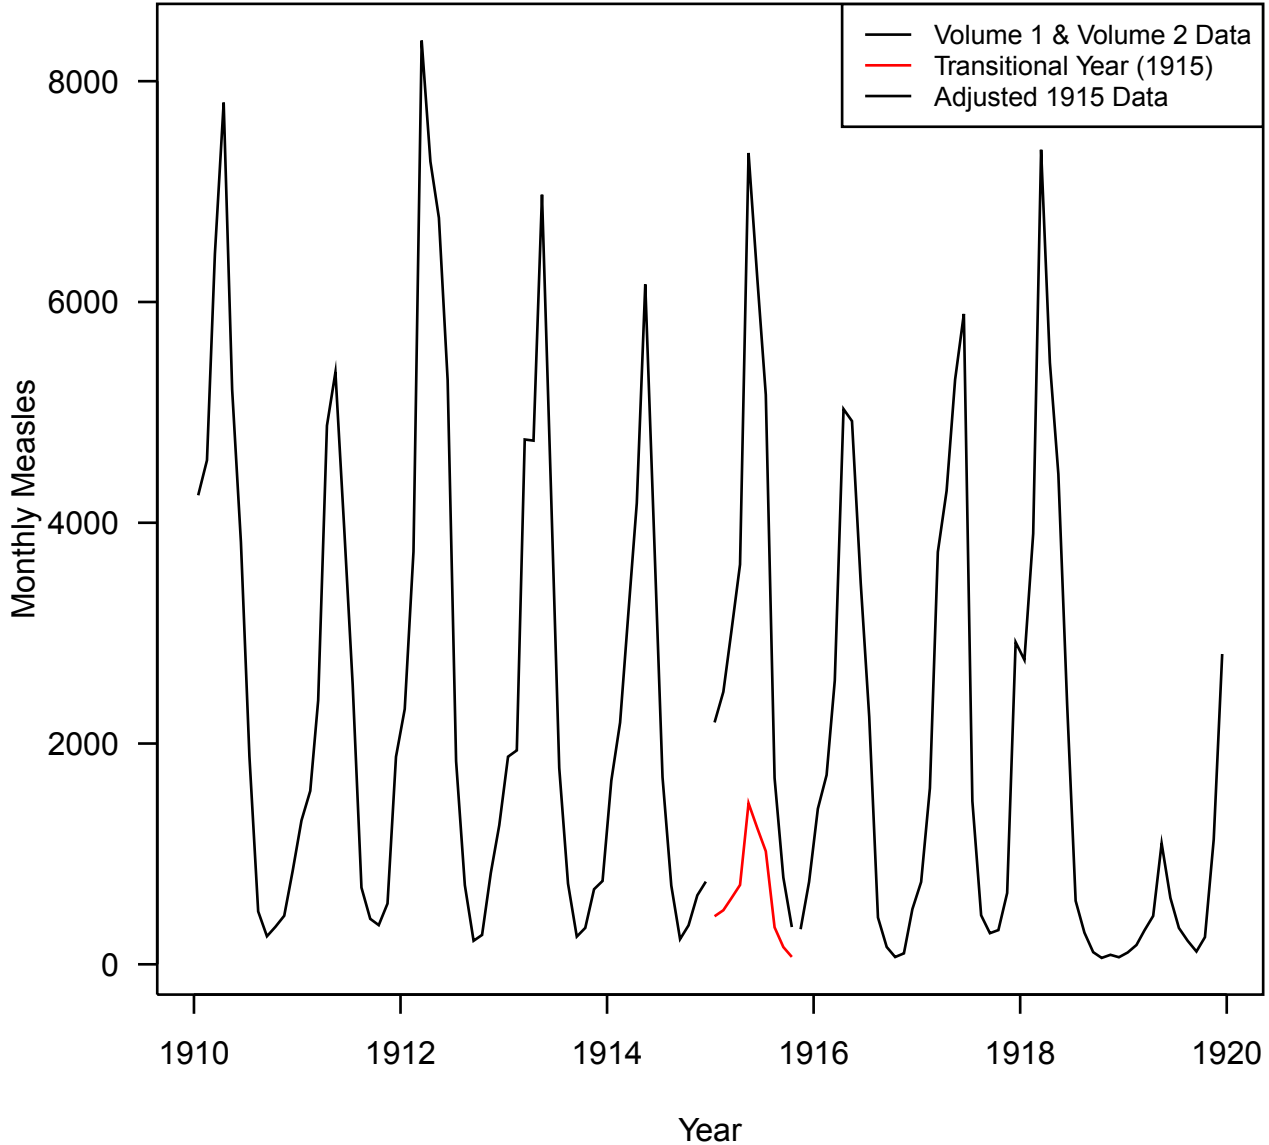

Figure S7: Time series plot of tabulated Health Bulletin data from 1910–1920, showing original and adjusted 1915 reported measles cases from three hospitals in the context of city-wide measles cases for other years.

### S1.5 Formatting the Data

For our analysis, we make use of weekly and monthly aggregated measles data, and yearly vital data. For large time spans (namely 1932–1958 and 1976–1984), we have only monthly data, hence we interpolate pseudo-weekly data from the monthly data points.

For vital statistics, we obtain yearly total population and birth rates from the NYC Health Bulletins for 1891–1900 as detailed previously §S1.1.2, and from the NYC Dept. of Health vital statistics reports for 1900–1984. Note that the vital statistics reports contain only data points every 5 years from 1900–1935.



We do not interpolate yearly points from this because the Vital Statistics Reports give a single estimate for each of the 5-years.

## S1.6 Summary of Available and Compiled Data

Since we are using data from various overlapping sources, we need to pick time points where we transition from one source to the next. Since it is better to do analyses using originally recorded weekly data rather than pseudo-weekly interpolation, we will use as much originally recorded weekly data as possible.

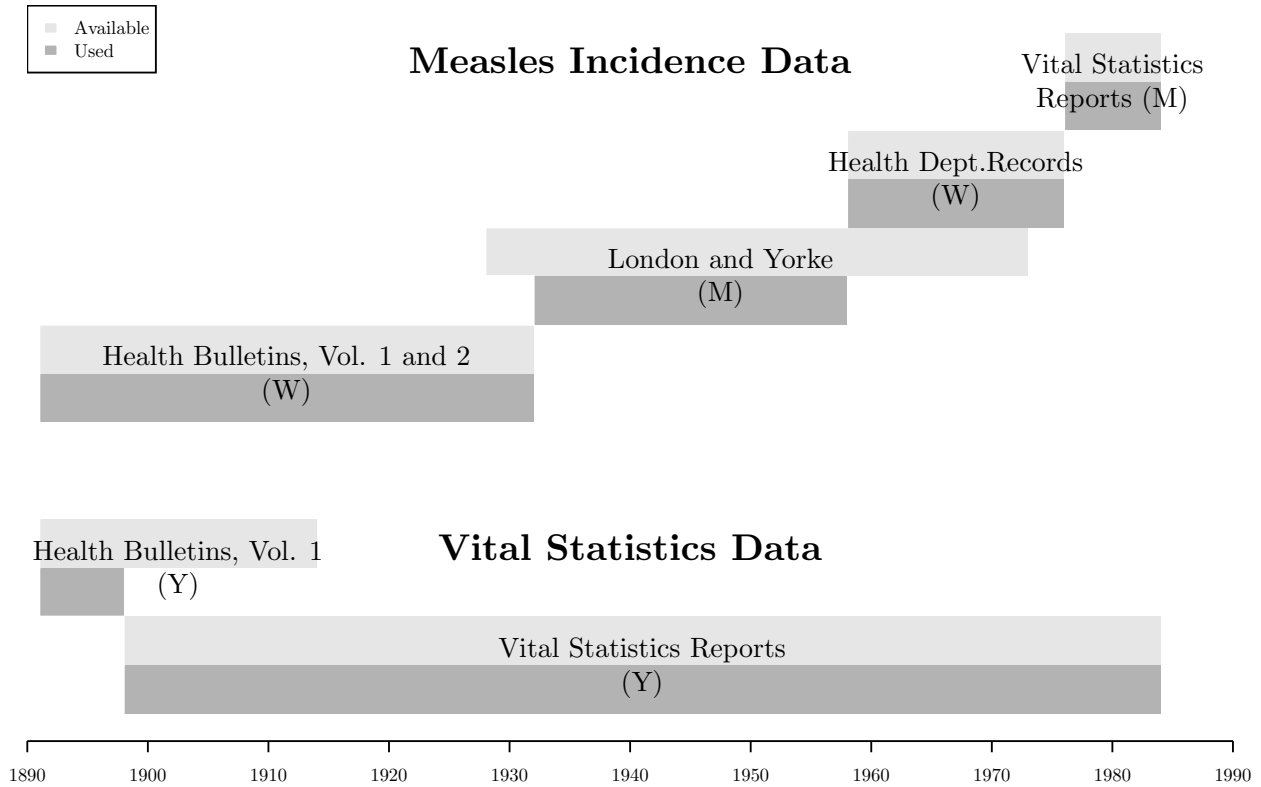

Figure S8: Summary of available and used data.

## S1.7 Normalized Data

For our analysis of the disease incidence data, we need to control for changes in population size. To this end we have constructed a time series of yearly total population numbers, as detailed previously. Using the population data, we can normalize disease incidence data with respect to population size. This serves to remove elements of the dynamics which are simply artifacts of changes in population, and what remains is a more consistent representation of the dynamics of measles. See Figure S9 for a plot of total population with respect to time, which we use to normalize our data. Note in particular the high rate of population growth in the early 1900s; much of an apparent rise in measles incidence can be attributed to this. The sudden jump in the population data is attributed to a change in reporting area (see §S1.1)

## New York Total Population

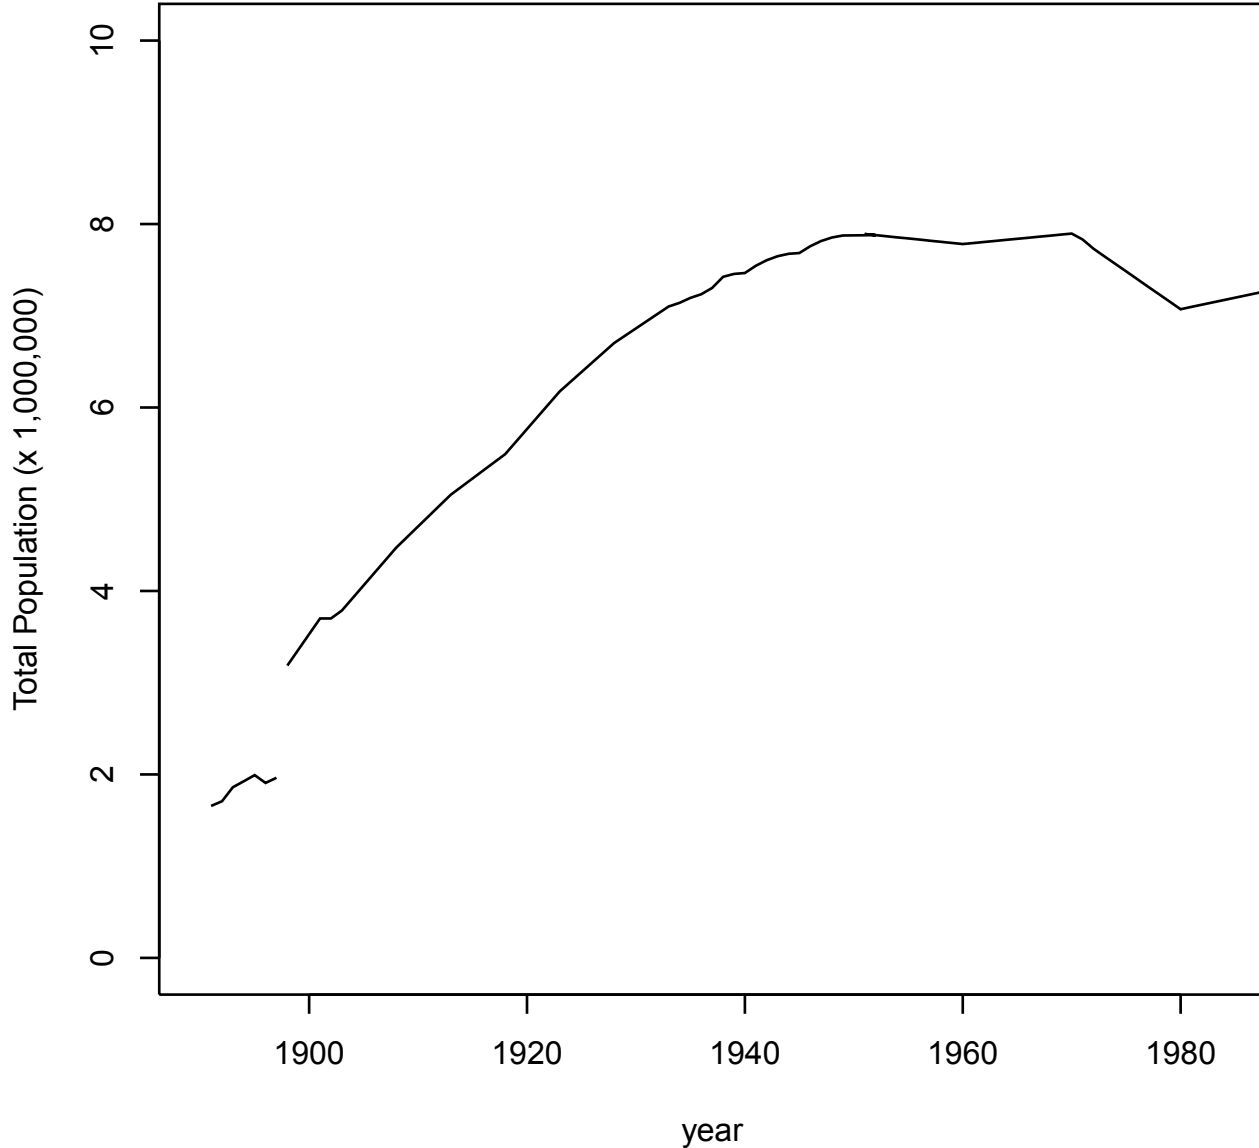

Figure S9: Time series plot of the total population of NYC from 1891–1984.

### S1.8 Consistency Checks

Since much of the data we use is from original digitization, it is appropriate to conduct a number of checks on the data to ensure that its quality is acceptable for the analysis. We therefore cross-reference our new data with as much independent information as we can. To this end we perform the following three sanity checks on our new data:

1. The NYC Health Department Vital Statistics Reports [2] list yearly totals for disease incidence from 1911 to the present. Our first check takes yearly sums of our weekly data from the Health Bulletins

in the time-span of 1911–1932, and compares these yearly sums to data from the Health Department Vital Statistics Reports. See Figure S10 for this comparison. We conclude that, with the exception of the year 1915 (which we dealt with previously), the close match of these totals evidences reliability of the Health Bulletin data.

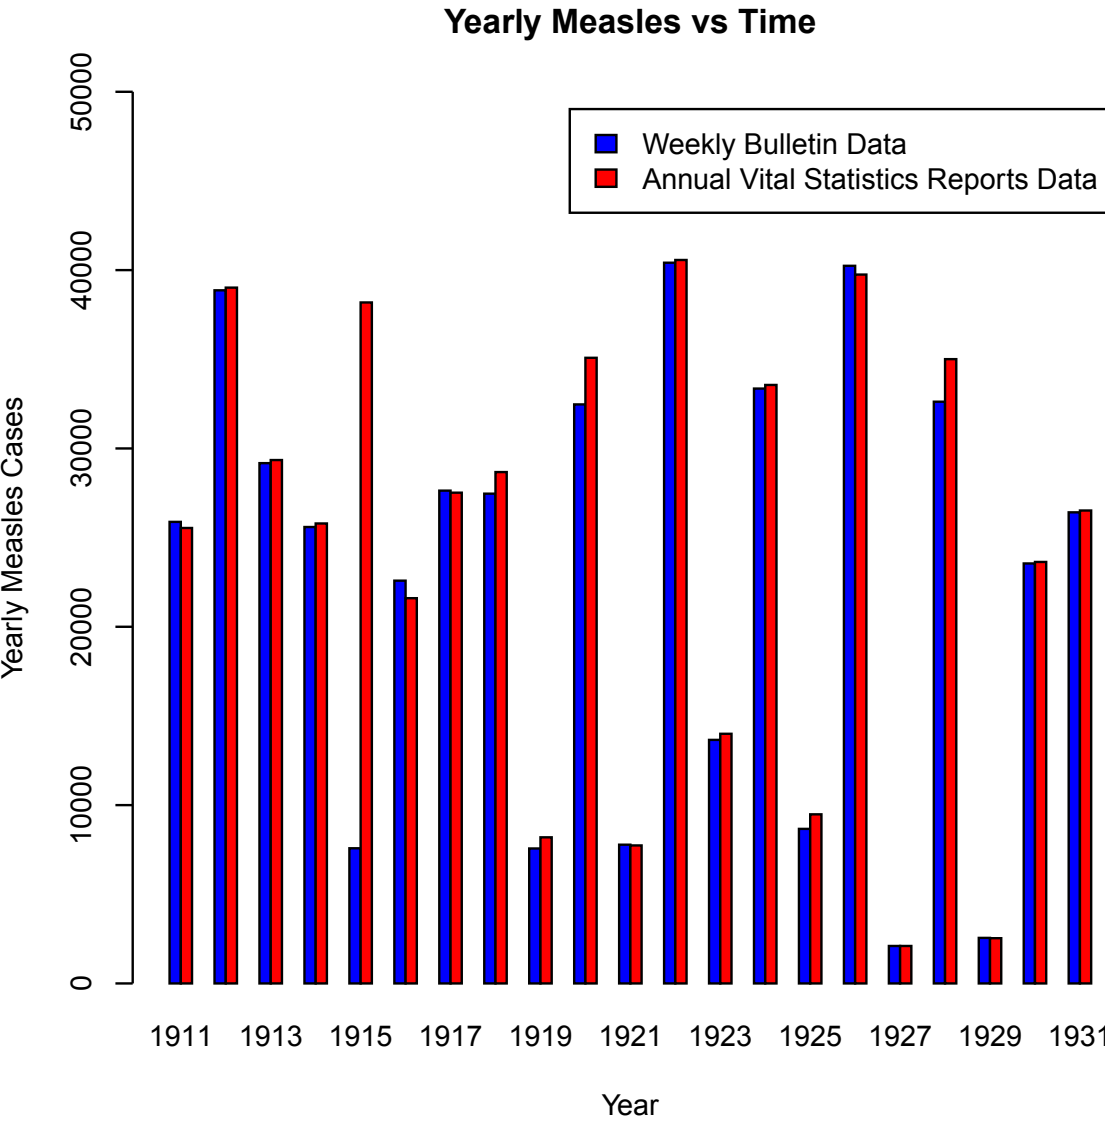

Figure S10: Overlapping time series plots of yearly measles incidence counts taken from the Health Bulletins and the Health Dept. Vital Statistics Reports.

2. Much of the newly digitized data overlaps with monthly data previously published by London and Yorke [11]. We can therefore use monthly tabulated totals of our original weekly data in the overlapping periods and compare them to London and Yorke’s data. The results of this second check are shown in Figures S11 and S12. Interestingly, these numbers do not match up perfectly, suggesting that adjustments were made by the NYC Health Department to the data we acquired (both from the Health Bulletins and the Health Department Records), prior to its tabulation in the paper published

in 1973 by London and Yorke [11].<sup>2</sup> The monthly sums of measles cases, however, match up closely enough in both overlapping time periods that we conclude our weekly data are reliable.

### Monthly Measles vs Time in Overlapping Period (1928–1932)

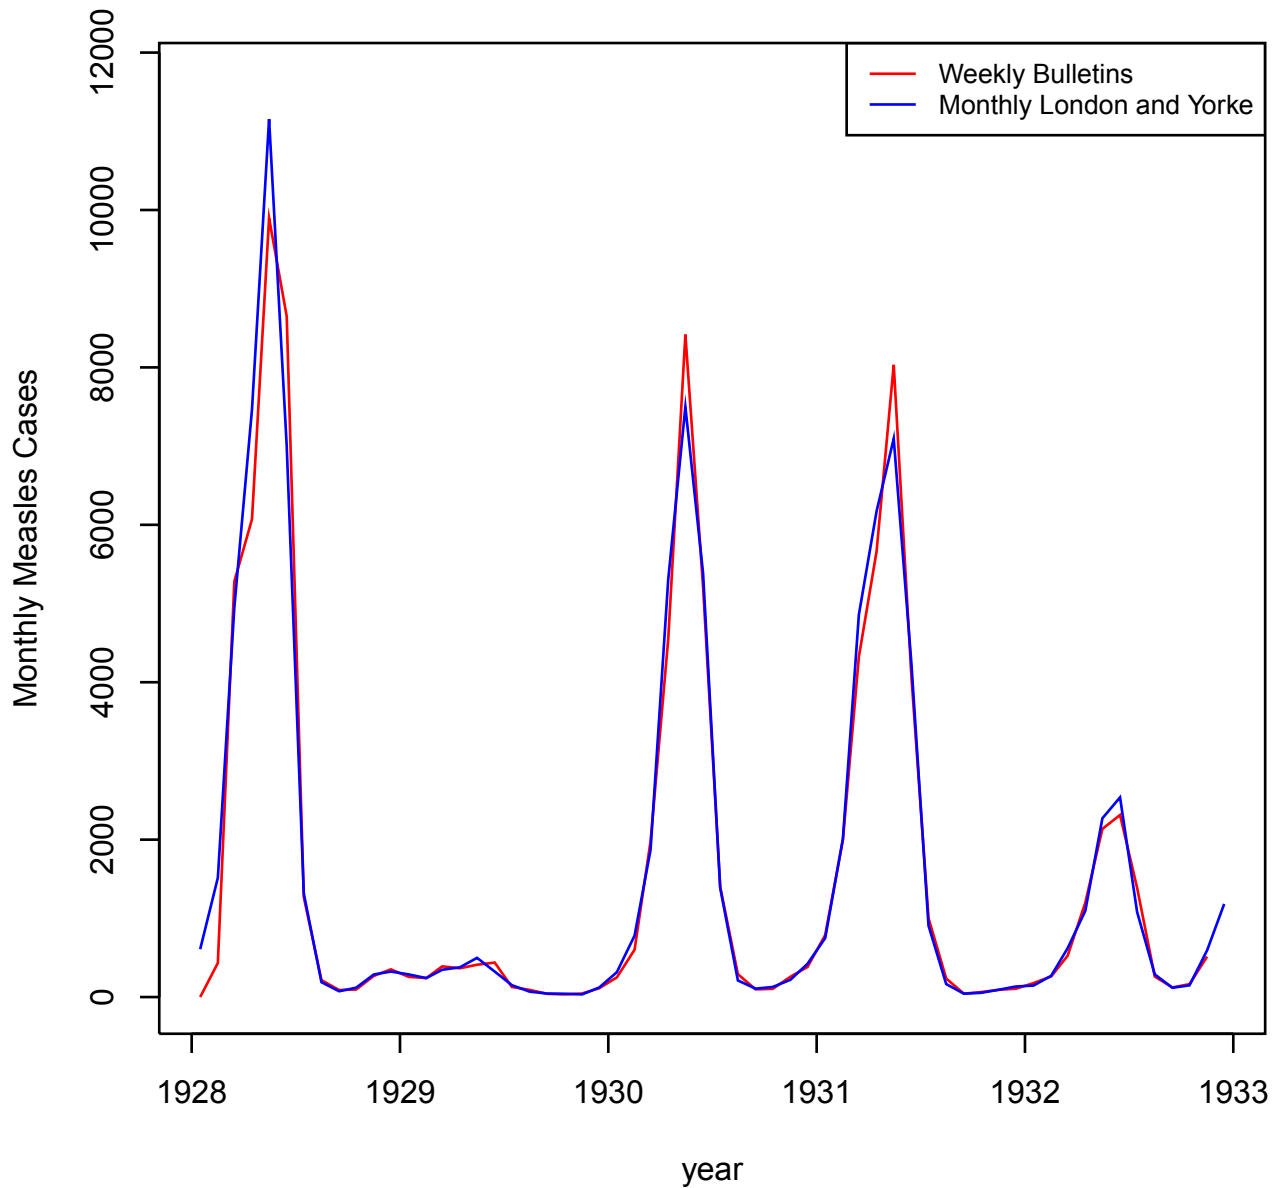

Figure S11: Overlapping time series plots of London and Yorke’s monthly measles incidence rates, and the Health Dept. Bulletins weekly measles incidence rates, from 1928–1932. To compare these numbers, we have summed the weekly Bulletin data monthly, summing up the number of measles cases reported at the ends of weeks that fall in the same month.

<sup>2</sup>London and Yorke give very little information regarding the source of the data published their 1973 paper [11], only mentioning that the provider was the NYC Health Dept. Bureau of Infectious Disease Control (which no longer exists).



## Monthly Measles vs Time in Overlapping Period (1958–1972)

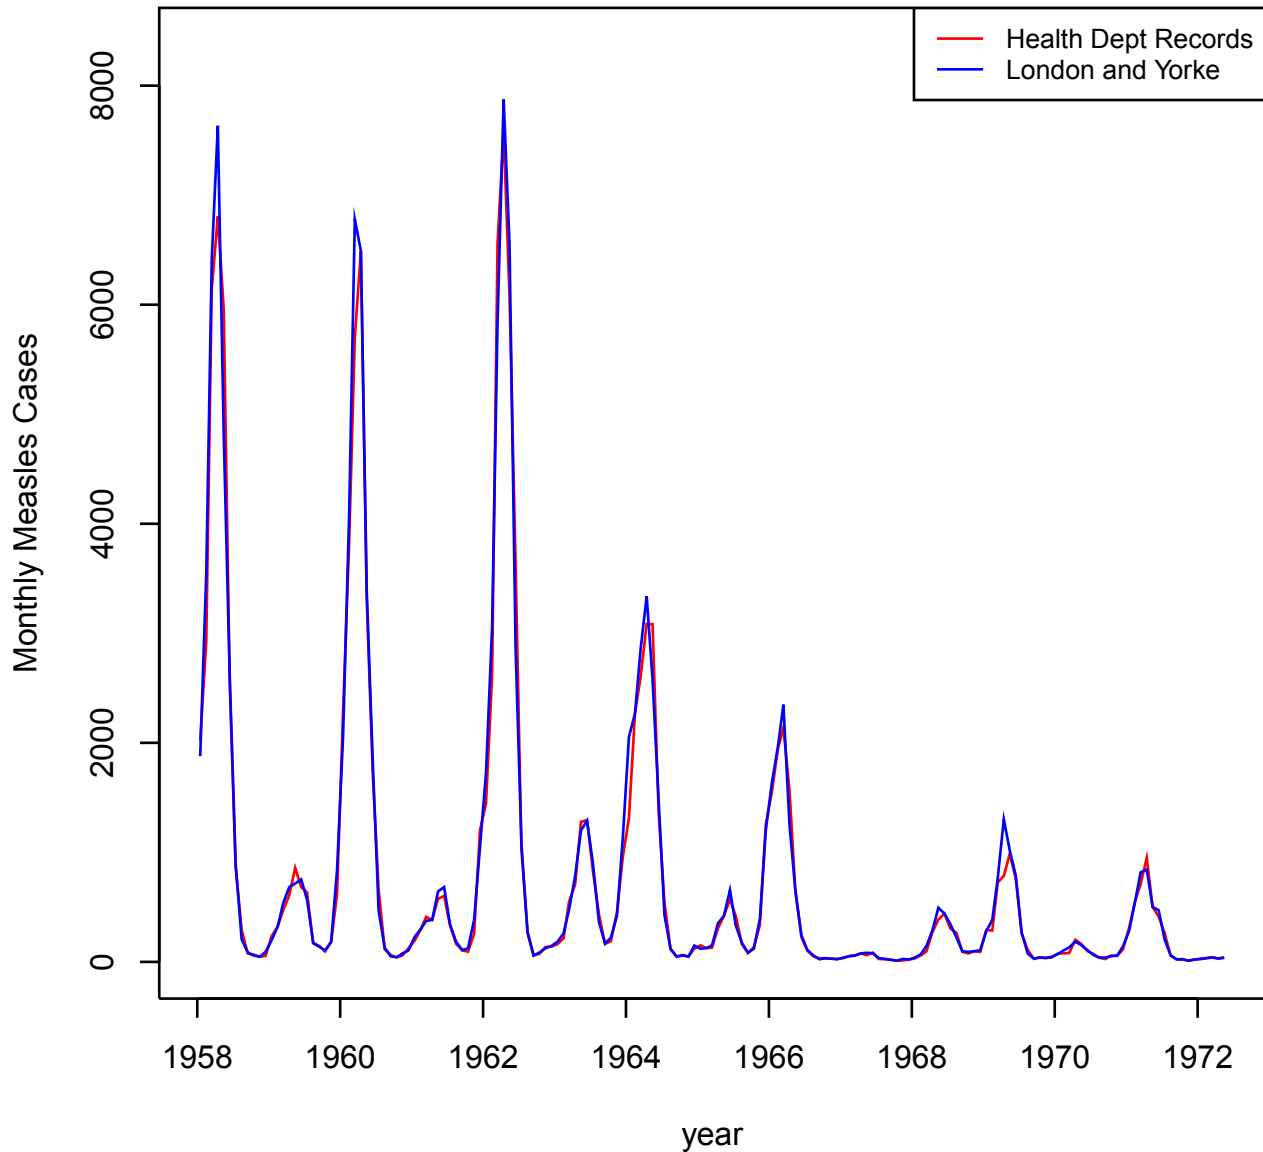

Figure S12: Overlapping time series plots of London and Yorke’s monthly measles incidence rates, and the Health Dept. Records weekly incidence rates summed monthly, from 1958–1973.

Jan 31, 1920 In Figure S13, we show a page from the Weekly Bulletins in which an epidemic of influenza can be seen from the case reports, peaking on Jan 31, 1920 with a number of reported cases of 30456. For this same week, the cases of measles are reported as 4671, where the previous and following weeks were 1984 and 2035, respectively. Such a high number of reported measles cases seems unlikely, and possibly erroneously entered, but could otherwise have been misdiagnoses from the influenza outbreak.

|                                  | Dec. 13 | Dec. 20 | Dec. 27 | Jan. 3 | Jan. 10 | Jan. 17 | Jan. 24 | Jan. 31 | Feb. 7 | Feb. 14 | Feb. 21 | Feb. 28 | Mar. 6 |
|----------------------------------|---------|---------|---------|--------|---------|---------|---------|---------|--------|---------|---------|---------|--------|
| Total deaths .....               | 1287    | 1249    | 1288    | 1401   | 1534    | 1461    | 1949    | 2803    | 3502   | 3518    | 2480    | 1828    | 1712   |
| Annual Death Rate                | 11.18   | 10.85   | 11.19   | 11.90  | 13.03   | 12.41   | 16.56   | 23.81   | 29.75  | 29.84   | 21.07   | 15.49   | 14.54  |
| *Acute Infectious Diseases ..... | 51      | 61      | 47      | 65     | 60      | 81      | 78      | 86      | 109    | 185     | 121     | 96      | 76     |
| Pul. Tuberculosis..              | 112     | 104     | 114     | 127    | 149     | 114     | 121     | 160     | 178    | 177     | 180     | 147     | 153    |
| Influenza.....                   | 10      | 8       | 12      | 11     | 12      | 18      | 116     | 557     | 965    | 781     | 360     | 151     | 82     |
| Lobar Pneumonia..                | 77      | 85      | 107     | 103    | 118     | 141     | 240     | 467     | 548    | 571     | 294     | 159     | 121    |
| Broncho Pneum...                 | 62      | 70      | 59      | 86     | 87      | 107     | 163     | 284     | 475    | 494     | 333     | 203     | 166    |
| **Violent Deaths....             | 75      | 64      | 96      | 84     | 104     | 72      | 85      | 75      | 58     | 68      | 57      | 52      | 78     |
| Deaths under 1 year.             | 196     | 168     | 192     | 180    | 217     | 191     | 276     | 286     | 356    | 432     | 409     | 313     | 258    |
| Rates per 1,000 births           | 79.3    | 67.8    | 77.4    | 71.7   | 86.2    | 75.8    | 109.4   | 113.5   | 141.0  | 170.9   | 160.9   | 123.4   | 101.8  |
| Deaths under 5 years             | 287     | 257     | 284     | 279    | 333     | 333     | 436     | 485     | 725    | 824     | 721     | 505     | 423    |
| " 5-65 years....                 | 695     | 701     | 705     | 777    | 855     | 789     | 1091    | 1814    | 2165   | 2045    | 1339    | 947     | 939    |
| " 65 years and over .....        | 305     | 291     | 299     | 345    | 346     | 339     | 422     | 504     | 612    | 644     | 420     | 371     | 345    |

\*\*"Acute Infectious Diseases" include Typhoid Fever, Scarlet Fever, Measles, Diphtheria, Whooping Cough, Smallpox and Cerebro-spinal Meningitis.  
 \*\*Does not include suicides.

### Cases of Reportable Infectious Diseases.

|                           | Dec. 13 | Dec. 20 | Dec. 27 | Jan. 3 | Jan. 10 | Jan. 17 | Jan. 24 | Jan. 31 | Feb. 7 | Feb. 14 | Feb. 21 | Feb. 28 | Mar. 6 |
|---------------------------|---------|---------|---------|--------|---------|---------|---------|---------|--------|---------|---------|---------|--------|
| Tuberculosis .....        | 297     | 245     | 172     | 196    | 230     | 341     | 150     | 648     | 113    | 407     | 170     | 478     | 318    |
| Diphtheria .....          | 344     | 329     | 296     | 320    | 327     | 322     | 332     | 766     | 339    | 327     | 321     | 243     | 300    |
| Measles .....             | 656     | 687     | 1012    | 1246   | 1626    | 1577    | 1984    | 4671    | 2035   | 1899    | 2160    | 1690    | 1589   |
| Scarlet Fever .....       | 189     | 113     | 124     | 129    | 123     | 154     | 147     | 307     | 145    | 154     | 145     | 125     | 250    |
| Chickenpox .....          | 144     | 172     | 133     | 167    | 184     | 216     | 154     | 499     | 95     | 141     | 131     | 119     | 99     |
| Influenza .....           | 47      | 54      | 88      | 42     | 100     | 384     | 5690    | 30456   | 21338  | 3091    | 3030    | 1069    | 439    |
| Pneumonia .....           | 201     | 281     | 295     | 331    | 528     | 718     | 1044    | 4768    | 4535   | 3306    | 1705    | 891     | 583    |
| Typhoid Fever .....       | 15      | 15      | 2       | 11     | 19      | 15      | 10      | 45      | 3      | 5       | 7       | 1       | 5      |
| Whooping Cough ...        | 59      | 90      | 118     | 133    | 147     | 189     | 180     | 435     | 185    | 225     | 243     | 203     | 250    |
| Syphilis .....            | 283     | 228     | 220     | 330    | 332     | 443     | 362     | 435     | 351    | 376     | 485     | 335     | 254    |
| Gonorrhoea .....          | 59      | 94      | 75      | 40     | 48      | 28      | 56      | 72      | 43     | 28      | 100     | 128     | 16     |
| Poliomyelitis .....       | 1       | ..      | 1       | ..     | ..      | ..      | ..      | 1       | ..     | 1       | ..      | 1       | 1      |
| Cerebro-spinal Meningitis | 3       | 7       | 4       | 3      | 11      | 3       | 4       | 14      | 7      | 6       | 9       | 9       | 5      |
| Total .....               | 2248    | 2315    | 2540    | 2998   | 3675    | 438     | 10113   | 43117   | 29239  | 14966   | 8506    | 5287    | 4174   |

Figure S13: Weekly Bulletins pages showing weekly reported cases for infectious diseases from 13 December 1919 to 6 March 1920. The reported number of cases of measles for the week of 31 January is unusually high (no other weekly count exceeds 2500 until the year 1941). Concurrent with an apparent measles epidemic is an influenza epidemic, which suggests that the 31 January reported number—and possibly others— could result from misdiagnoses. It is also possible that the unusually high number, if it is incorrect, resulted from a clerical error.

## S2 Transient Periods in Wavelet Spectra

A wavelet spectrum of an epidemic time series typically has peaks at the periodicities of attractors that the system visits. However, transient periods do not reveal themselves as consistently as attractor periods, since they depend on demographic stochasticity to be maintained [3,4,7]. The distance of the system from a periodic attractor is influenced by random stochastic perturbations, and the spectral power of transient periods in the time series depends on this distance. As a result, we should expect significant lack of homogeneity in the spectral power of transient periods in disease time series.

To verify this intuition, we simulated many realizations of the stochastic SIR model, and we show wavelet spectra [5, 6, 9, 10, 12] of a subset of these simulated time series in Figures S14 to S19. In order to produce simulated time series comparable to our NYC measles time series, we produced simulations of the same length as the measles time series. We produced 10 stochastic SIR realizations for each of 6 different parameter sets. Three parameter sets fixed  $\mu = \nu = 0.02/\text{year}$ , and the other three parameter sets were defined using birth and death rates derived from NYC vital statistics. In both groups of parameter sets, we considered three  $\mathcal{R}_0$  values ( $\mathcal{R}_0 \in \{12, 14.5, 17\}$ ). The mean infectious period was set to 13 days in all simulations, and the initial total population was fixed at the NYC population in 1891 (the beginning of the time series). For each parameter set, we show one of the 10 realizations in Figures S14 to S19.

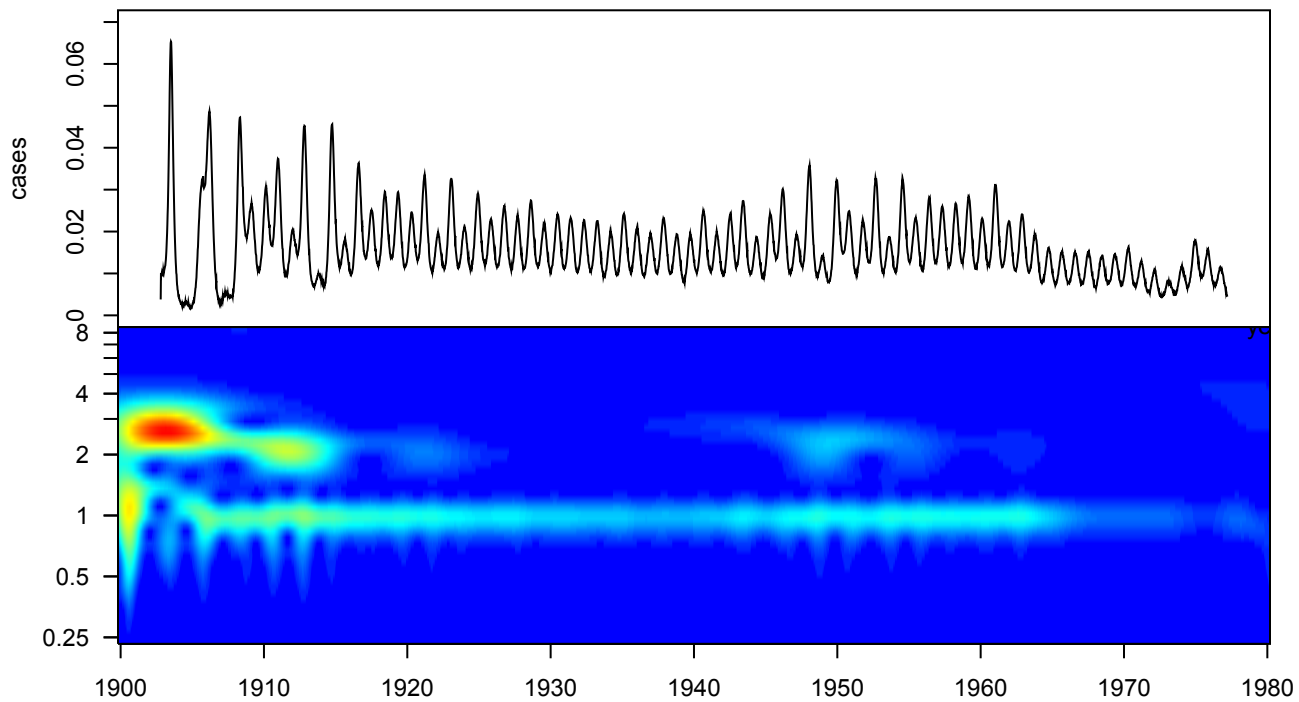

Figure S14: Stochastic SIR simulation emulating NYC. *Top panel:* cases time series. *Bottom panel:* wavelet spectrum. *Parameter values:*  $\mathcal{R}_0 = 12$ ,  $1/\gamma = 13$  days,  $\mu = \nu = 0.02 \text{ yr}^{-1}$ .



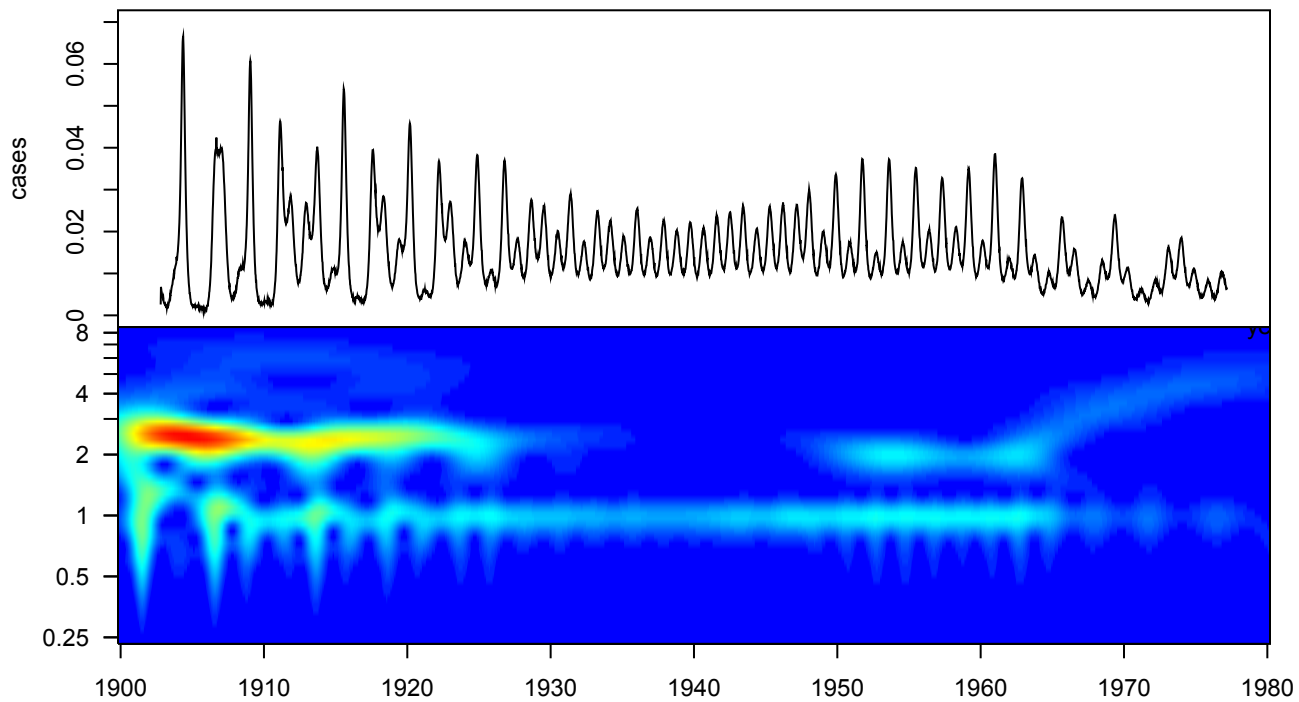

Figure S15: Stochastic SIR simulation emulating NYC. *Top panel:* cases time series. *Bottom panel:* wavelet spectrum. *Parameter values:*  $\mathcal{R}_0 = 14.5$ ,  $1/\gamma = 13$  days,  $\mu = \nu = 0.02 \text{ yr}^{-1}$ .

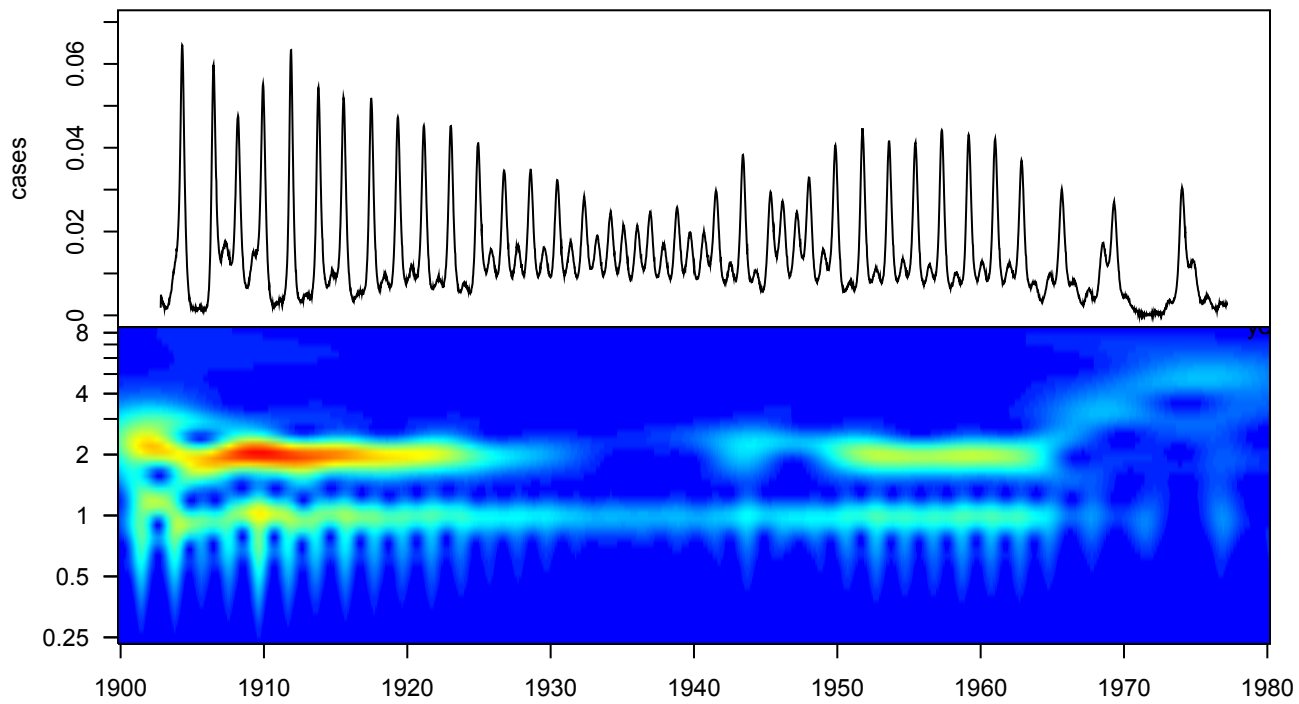

Figure S16: Stochastic SIR simulation emulating NYC. *Top panel:* cases time series. *Bottom panel:* wavelet spectrum. *Parameter values:*  $\mathcal{R}_0 = 17$ ,  $1/\gamma = 13$  days,  $\mu = \nu = 0.02 \text{ yr}^{-1}$ .

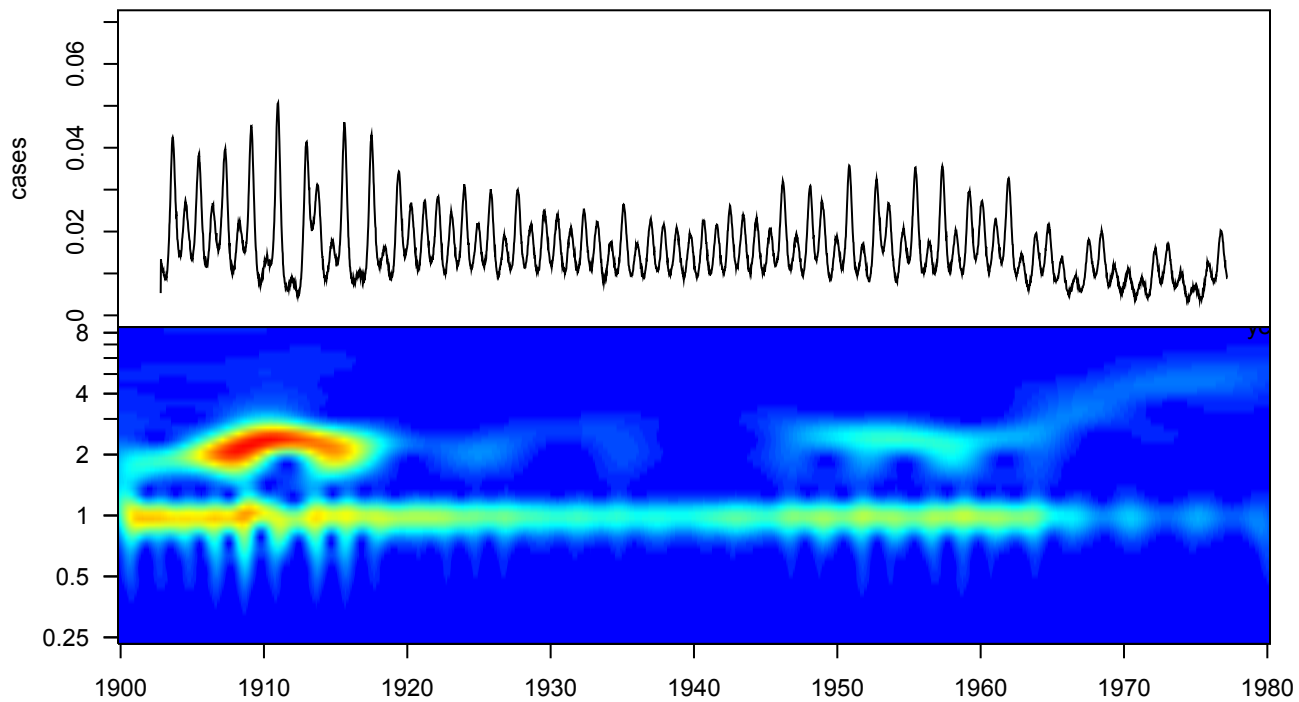

Figure S17: Stochastic SIR simulation emulating NYC. *Top panel:* cases time series. *Bottom panel:* wavelet spectrum. *Parameter values:*  $\mathcal{R}_0 = 12$ ,  $1/\gamma = 13$  days,  $\mu(t)$  and  $\nu(t)$  are realistic NYC values changing with time.

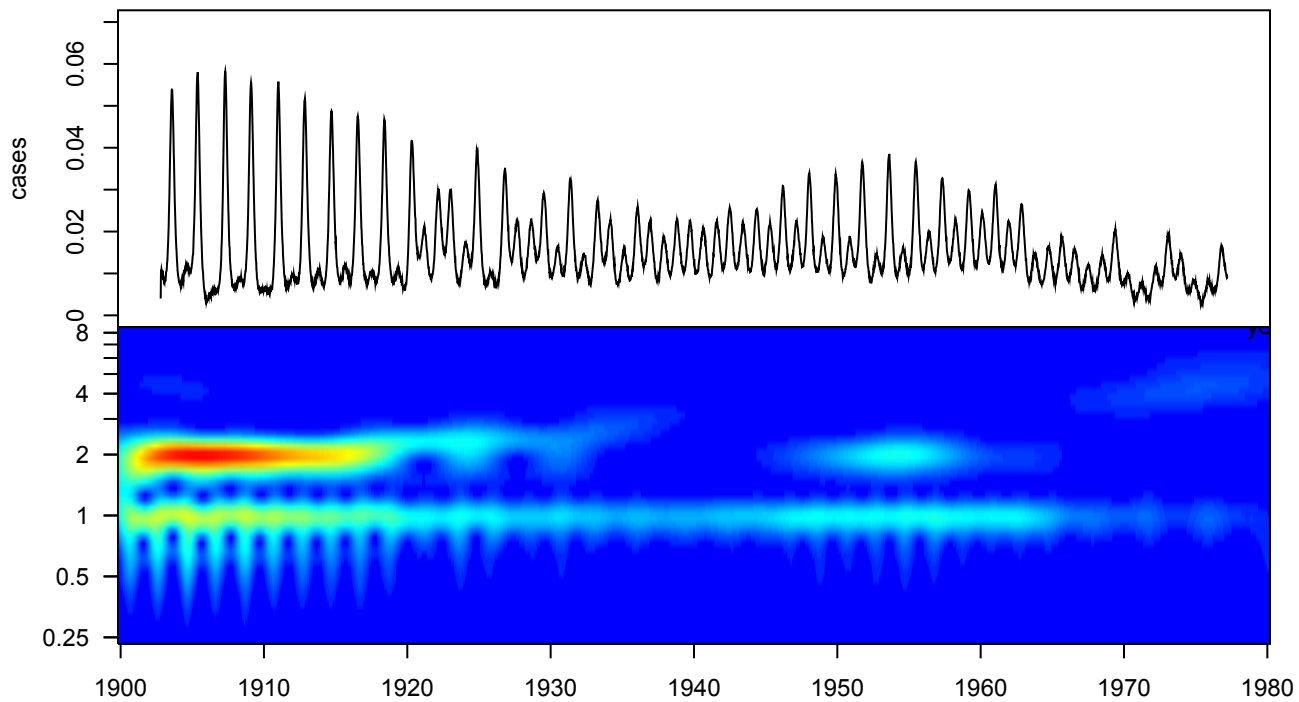

Figure S18: Stochastic SIR simulation emulating NYC. *Top panel:* cases time series. *Bottom panel:* wavelet spectrum. *Parameter values:*  $\mathcal{R}_0 = 14.5$ ,  $1/\gamma = 13$  days,  $\mu(t)$  and  $\nu(t)$  are realistic NYC values changing with time.



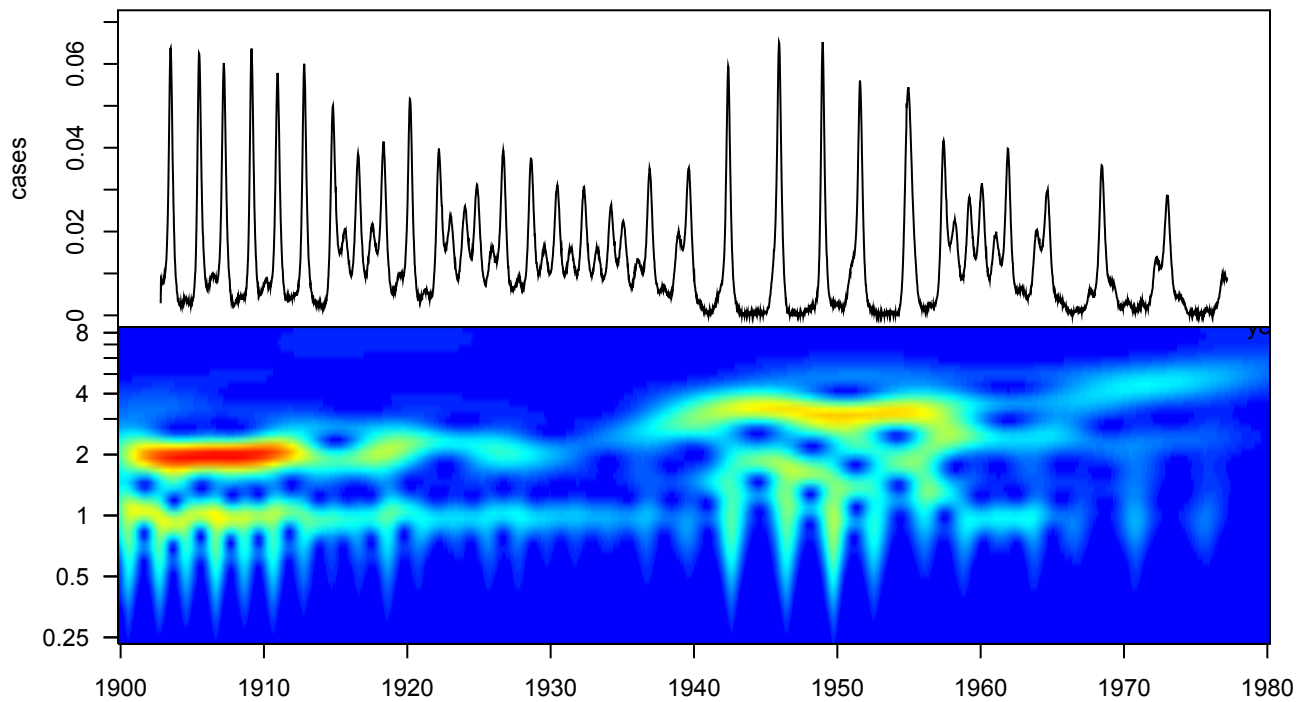

Figure S19: Stochastic SIR simulation emulating NYC. *Top panel:* cases time series. *Bottom panel:* wavelet spectrum. *Parameter values:*  $\mathcal{R}_0 = 17$ ,  $1/\gamma = 13$  days,  $\mu(t)$  and  $\nu(t)$  are realistic NYC values changing with time.

# S3 Sample Photographs from Data Sources

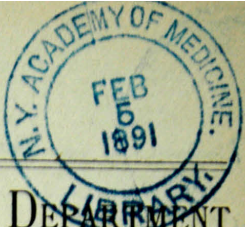

OFFICIAL.

## WEEKLY REPORT OF THE HEALTH DEPARTMENT OF THE CITY OF NEW YORK.

ISSUED BY ORDER OF THE BOARD.

Vol. I.]      WEEK ENDING SATURDAY, 12 M., JANUARY 31, 1891.      [No. 5.

---

Estimated Population, †1,660,348.      Death-rate, 23.16.

---

*Cases of Infectious and Contagious Disease Reported.*

|                   | WEEK ENDING— |            |            |            |            |            |            |            |            |               |            |            |            |            |
|-------------------|--------------|------------|------------|------------|------------|------------|------------|------------|------------|---------------|------------|------------|------------|------------|
|                   | Nov. 1.      | Nov. 8.    | Nov. 15.   | Nov. 22.   | Nov. 29.   | Dec. 6.    | Dec. 13.   | Dec. 20.   | Dec. 27.   | Jan. 3, 1891. | Jan. 10.   | Jan. 17.   | Jan. 24.   | Jan. 31.   |
| Diphtheria.....   | 57           | 81         | 84         | 97         | 86         | 81         | 120        | 114        | 94         | 105           | 95         | 90         | 103        | 107        |
| Measles.....      | 108          | 131        | 183        | 141        | 236        | 238        | 269        | 319        | 253        | 298           | 390        | 413        | 453        | 433        |
| Scarlet Fever.... | 53           | 58         | 65         | 65         | 79         | 93         | 69         | 86         | 108        | 113           | 154        | 134        | 146        | 174        |
| Small-pox.....    | ...          | 1          | ...        | 1          | 1          | ...        | ...        | ...        | ...        | ...           | ...        | ...        | ...        | ...        |
| Typhoid Fever...  | 30           | 27         | 21         | 25         | 16         | 23         | 21         | 12         | 9          | 16            | 8          | 7          | 10         | 13         |
| Typhus Fever...   | ...          | ...        | ...        | ...        | ...        | 1          | ...        | ...        | ...        | ...           | ...        | ...        | ...        | ...        |
| <b>Total.....</b> | <b>248</b>   | <b>298</b> | <b>353</b> | <b>329</b> | <b>418</b> | <b>436</b> | <b>479</b> | <b>531</b> | <b>464</b> | <b>532</b>    | <b>647</b> | <b>644</b> | <b>712</b> | <b>727</b> |

  

|                         |     |  |                             |     |
|-------------------------|-----|--|-----------------------------|-----|
| Marriages reported..... | 248 |  | Burial permits issued.....  | 737 |
| Births.....             | 849 |  | Transit permits issued..... | 5   |
| Deaths.....             | 737 |  | Searches made.....          | 256 |
| Still-births.....       | 65  |  | Transcripts issued.....     | 204 |

*Deaths According to Cause, Age and Sex.*

|                               | Total.     | †Total last year. | *Average 10 years. | Sexes.     |            | Age.           |                           |                     |                |                |           |           |            |            |              |
|-------------------------------|------------|-------------------|--------------------|------------|------------|----------------|---------------------------|---------------------|----------------|----------------|-----------|-----------|------------|------------|--------------|
|                               |            |                   |                    | Males.     | Females.   | Under 1 Month. | 1 Month and under 1 Year. | 1 Year and under 2. | 2 and under 5. | Under 5 Years. | 5-15.     | 15-25.    | 25-45.     | 45-65.     | 65 and over. |
| <b>Total, all causes.....</b> | <b>737</b> | <b>782</b>        | <b>825.3</b>       | <b>390</b> | <b>347</b> | <b>55</b>      | <b>107</b>                | <b>70</b>           | <b>68</b>      | <b>300</b>     | <b>40</b> | <b>53</b> | <b>143</b> | <b>127</b> | <b>74</b>    |
| Diphtheria.....               | 28         | 24                | 37.7               | 14         | 14         | 1              | 1                         | 8                   | 11             | 21             | 7         | ..        | ..         | ..         | ..           |
| Croup.....                    | 12         | 12                | 24.5               | 6          | 6          | ..             | 2                         | 2                   | 7              | 11             | 1         | ..        | ..         | ..         | ..           |
| Malarial Fevers.....          | 5          | 4                 | 5.0                | 4          | 1          | ..             | ..                        | 1                   | 1              | 2              | 1         | ..        | 2          | ..         | ..           |
| Measles.....                  | 32         | 10                | 23.8               | 20         | 12         | ..             | 6                         | 14                  | 9              | 29             | 2         | ..        | 1          | ..         | ..           |
| Scarlet Fever.....            | 23         | 13                | 36.5               | 11         | 12         | ..             | 2                         | 4                   | 12             | 18             | 5         | ..        | ..         | ..         | ..           |
| Small-pox.....                | ..         | ..                | 2.7                | ..         | ..         | ..             | ..                        | ..                  | ..             | ..             | ..        | ..        | ..         | ..         | ..           |
| Typhoid Fever.....            | 3          | 2                 | 4.8                | 1          | 2          | ..             | ..                        | ..                  | ..             | ..             | 1         | ..        | ..         | 1          | 1            |
| Typhus Fever.....             | ..         | ..                | ..                 | ..         | ..         | ..             | ..                        | ..                  | ..             | ..             | ..        | ..        | ..         | ..         | ..           |
| Whooping Cough.....           | 11         | 10                | 9.7                | 4          | 7          | ..             | 6                         | 2                   | 2              | 10             | 1         | ..        | ..         | ..         | ..           |
| Diarrhoeal Diseases.....      | 11         | 10                | 14.0               | 4          | 7          | 1              | 7                         | 1                   | ..             | 9              | ..        | ..        | ..         | ..         | 2            |

\* This column contains the average number of deaths for the corresponding week of the past ten years, increase do correspond with the increase of population.  
† This column gives the total number of deaths for the corresponding week of the previous year.  
‡ Police Census, October, 1890, 1,710,715.

M. B. Brown, Printer and Stationer, 49 & 51 Park Place, N. Y.

Figure S20: Weekly Bulletins Vol 1: Page 1



*Deaths According to Cause, Annual Rate per 1,000 and Age, with Meteorology, and Number of Deaths in Public Institutions for 13 weeks.*

| WEEK ENDING                                        | Nov. 8. | Nov. 15. | Nov. 22. | Nov. 29. | Dec. 6. | Dec. 13. | Dec. 20. | Dec. 27. | Jan. 3, 1891. | Jan. 10. | Jan. 17. | Jan. 24. | Jan. 31. |
|----------------------------------------------------|---------|----------|----------|----------|---------|----------|----------|----------|---------------|----------|----------|----------|----------|
| Total deaths.....                                  | 671     | 643      | 583      | 654      | 672     | 704      | 731      | 705      | 764           | 744      | 786      | 748      | 737      |
| Annual death-rate.....                             | 21.23   | 20.33    | 18.43    | 20.66    | 21.21   | 22.21    | 23.05    | 22.22    | 24.06         | 23.42    | 24.73    | 23.52    | 23.16    |
| Diphtheria.....                                    | 19      | 27       | 29       | 22       | 31      | 31       | 37       | 31       | 28            | 14       | 19       | 22       | 28       |
| Croup.....                                         | 5       | 17       | 6        | 20       | 14      | 11       | 11       | 14       | 11            | 16       | 22       | 11       | 12       |
| Malarial Fevers.....                               | 5       | 3        | 3        | 1        | 1       | 5        | 3        | 6        | 4             | 2        | 3        | 4        | 5        |
| Measles.....                                       | 13      | 11       | 12       | 12       | 12      | 15       | 15       | 19       | 22            | 15       | 18       | 33       | 32       |
| Scarlet Fever.....                                 | 11      | 7        | 10       | 10       | 5       | 10       | 11       | 11       | 21            | 16       | 22       | 20       | 23       |
| Small-pox.....                                     | ..      | ..       | ..       | ..       | ..      | ..       | ..       | ..       | ..            | ..       | ..       | ..       | ..       |
| Typhoid Fever.....                                 | 10      | 10       | 7        | 5        | 8       | 11       | 3        | 5        | 7             | 3        | 3        | 3        | 3        |
| Typhus Fever.....                                  | ..      | ..       | ..       | ..       | ..      | ..       | ..       | ..       | ..            | ..       | ..       | ..       | ..       |
| Whooping Cough.....                                | 10      | 7        | 7        | 3        | 5       | 7        | 5        | 8        | 9             | 8        | 12       | 17       | 11       |
| Diarrhoeal Diseases.....                           | 20      | 11       | 8        | 8        | 10      | 9        | 11       | 9        | 10            | 10       | 9        | 13       | 11       |
| Diarrhoeal Diseases }<br>under 5 years..... }      | 17      | 8        | 3        | 7        | 6       | 6        | 7        | 7        | 6             | 7        | 4        | 8        | 9        |
| Phthisis.....                                      | 110     | 85       | 78       | 98       | 94      | 102      | 98       | 96       | 105           | 110      | 98       | 111      | 105      |
| Bronchitis.....                                    | 30      | 40       | 32       | 25       | 35      | 29       | 38       | 22       | 49            | 27       | 38       | 44       | 41       |
| Pneumonia.....                                     | 90      | 72       | 85       | 87       | 95      | 115      | 117      | 126      | 134           | 123      | 136      | 105      | 91       |
| Other Diseases of Res- }<br>piratory Organs..... } | 15      | 23       | 18       | 15       | 24      | 21       | 29       | 18       | 29            | 21       | 28       | 25       | 16       |
| Violent Deaths.....                                | 30      | 36       | 25       | 36       | 21      | 28       | 33       | 20       | 31            | 37       | 27       | 21       | 18       |
| Under one year.....                                | 140     | 134      | 109      | 133      | 120     | 126      | 142      | 130      | 152           | 140      | 165      | 157      | 162      |
| Under five years.....                              | 226     | 225      | 204      | 225      | 212     | 240      | 260      | 247      | 290           | 253      | 285      | 284      | 300      |
| Five to sixty-five.....                            | 369     | 352      | 320      | 355      | 371     | 375      | 393      | 374      | 390           | 405      | 403      | 384      | 363      |
| Sixty-five years and over                          | 76      | 66       | 59       | 74       | 89      | 89       | 78       | 84       | 84            | 85       | 98       | 80       | 74       |
| In Public Institutions....                         | 134     | 138      | 128      | 141      | 133     | 133      | 170      | 150      | 140           | 161      | 179      | 136      | 166      |
| Inquest Cases.....                                 | 73      | 89       | 76       | 85       | 73      | 89       | 87       | 80       | 91            | 110      | 87       | 70       | 83       |
| Mean barometer.....                                | 29.931  | 30.103   | 29.833   | 29.901   | 29.850  | 29.819   | 29.995   | 29.904   | 29.866        | 30.077   | 29.823   | 29.879   | 29.919   |
| Mean humidity.....                                 | 73      | 80       | 68       | 68       | 67      | 60       | 61       | 61       | 57            | 55       | 59       | 65       | 62       |
| Inches of rain.....                                | ..      | .39      | .32      | ..       | 1.00    | .05      | 1.87     | .77      | .80           | .07      | 2.38     | 1.42     | 1.46     |
| Mean temperature }<br>(Fahrenheit)..... }          | 48.9    | 47.2     | 45.9     | 35.2     | 32.0    | 29.7     | 32.0     | 31.5     | 29.0          | 25.7     | 34.6     | 36.5     | 38.9     |
| Maximum temperature }<br>(Fahrenheit)..... }       | 69°     | 60°      | 64°      | 59°      | 49°     | 47°      | 43°      | 47°      | 54°           | 41°      | 51°      | 53°      | 48°      |
| Minimum temperature }<br>(Fahrenheit)..... }       | 36°     | 37°      | 31°      | 19°      | 18°     | 16°      | 16°      | 15°      | 13°           | 17°      | 25°      | 23°      | 28°      |

*Infectious and Contagious Diseases in Hospital.*

|                      | WILLARD PARKER HOSPITAL.     |             |        | RIVERSIDE HOSPITAL. |                                  |          |         |        |
|----------------------|------------------------------|-------------|--------|---------------------|----------------------------------|----------|---------|--------|
|                      | Scarlet Fever<br>(Children). | Diphtheria. | Total. | Small-pox.          | Scarlet Fever,<br>(Adults Only.) | Measles. | Others. | Total. |
| Remaining Jan. 24... | 26                           | 3           | 29     | ..                  | 19                               | 22       | 4       | 45     |
| Admitted.....        | 10                           | 6           | 16     | ..                  | 4                                | 10       | 3       | 17     |
| Discharged.....      | 3                            | 4           | 7      | ..                  | 3                                | 12       | 1       | 16     |
| Died.....            | 3                            | ..          | 3      | ..                  | ..                               | 2        | ..      | 2      |
| Remaining Jan. 31... | 30                           | 5           | 35     | ..                  | 20                               | 18       | 6       | 44     |
| Total treated..      | 36                           | 9           | 45     | ..                  | 23                               | 32       | 7       | 62     |

Figure S21: Weekly Bulletins Vol 1: Page 2



## VITAL STATISTICS

Summary for Week Ending Saturday, 12 M., January 30, 1915.

| Boroughs.                 | Population U.S. Census April 15, 1910. | Estimated Population July 1, 1915. | Deaths.      |              |                    |              |            | Births.    | Marriages.   | Still-births. | Death-rate.        |  |  |
|---------------------------|----------------------------------------|------------------------------------|--------------|--------------|--------------------|--------------|------------|------------|--------------|---------------|--------------------|--|--|
|                           |                                        |                                    | 1914.        | 1915.        | *Cor-rected, 1915. | 1914.        | 1915.      |            |              |               | *Cor-rected, 1915. |  |  |
| Manhattan.....            | 2,311,542                              | 2,599,455                          | 794          | 756          | 754                | 1,471        | 450        | 58         | 16.31        | 15.23         | 15.18              |  |  |
| The Bronx.....            | 430,980                                | 795,742                            | 180          | 146          | 129                | 271          | 59         | 17         | 14.63        | 10.79         | 9.54               |  |  |
| Brooklyn.....             | 1,634,351                              | 1,990,014                          | 502          | 426          | 459                | 843          | 284        | 36         | 13.67        | 11.17         | 12.03              |  |  |
| Queens.....               | 284,241                                | 417,107                            | 114          | 96           | 91                 | 174          | 29         | 15.35      | 12.01        | 11.38         |                    |  |  |
| Richmond.....             | 85,969                                 | 162,614                            | 38           | 36           | 27                 | 30           | 13         | 19.99      | 18.30        | 13.73         |                    |  |  |
| <b>City of New York..</b> | <b>4,766,883</b>                       | <b>5,866,532</b>                   | <b>1,628</b> | <b>1,460</b> | <b>1,460</b>       | <b>2,789</b> | <b>835</b> | <b>118</b> | <b>15.21</b> | <b>13.12</b>  | <b>....</b>        |  |  |

\*Corrected according to borough of residence.

†The presence of several large institutions, the great majority of whose inmates are non-residents of the city, increases considerably the death-rate of this Borough.

### Deaths by Principal Causes, According to Locality and Age.

| Boroughs.         | Contagious Dis-eases detailed elsewhere. | Tuberculosis Pulmonalis. | Cerebro-Spinal Meningitis. | Bronchitis. | Diarrhoeal Diseases. | Diarrhoeal Dis-eases under 5 Years. | Pneumonia. | Broncho-Pneumonia. | Suicides. | Homicides. | Accidents. | Under 1 Year. | Under 5 Years. | 5-65 Years. | 65 Years and Over. |
|-------------------|------------------------------------------|--------------------------|----------------------------|-------------|----------------------|-------------------------------------|------------|--------------------|-----------|------------|------------|---------------|----------------|-------------|--------------------|
| Manhattan.....    | 26                                       | 98                       | 1                          | 7           | 13                   | 12                                  | 66         | 66                 | 8         | 4          | 25         | 154           | 207            | 405         | 144                |
| The Bronx.....    | 8                                        | 33                       | ..                         | 2           | 3                    | 3                                   | 11         | 9                  | 2         | ..         | 5          | 22            | 38             | 88          | 20                 |
| Brooklyn.....     | 17                                       | 34                       | 1                          | 8           | 14                   | 13                                  | 42         | 29                 | 4         | 1          | 10         | 73            | 101            | 214         | 111                |
| Queens.....       | 5                                        | 15                       | ..                         | 1           | 1                    | 1                                   | 10         | 4                  | 1         | 1          | 2          | 14            | 20             | 56          | 20                 |
| Richmond.....     | ..                                       | 10                       | ..                         | ..          | ..                   | ..                                  | 4          | 4                  | ..        | 1          | 3          | 3             | 6              | 19          | 11                 |
| <b>Total.....</b> | <b>56</b>                                | <b>190</b>               | <b>2</b>                   | <b>18</b>   | <b>31</b>            | <b>29</b>                           | <b>127</b> | <b>112</b>         | <b>15</b> | <b>6</b>   | <b>43</b>  | <b>266</b>    | <b>372</b>     | <b>782</b>  | <b>306</b>         |

### Corrected Mortality Among Children.

| Boroughs                   | Under 1 Year of Age. |                        |                      |                        |                |            | Under 5 Years of Age. |                        |                      |                        |                     |                        |
|----------------------------|----------------------|------------------------|----------------------|------------------------|----------------|------------|-----------------------|------------------------|----------------------|------------------------|---------------------|------------------------|
|                            | All Causes.          | Rate per 1,000 Births. | Diarrhoeal Diseases. |                        |                |            | All Causes.           | Rate per 1,000 Living. | Diarrhoeal Diseases. | Rate per 1,000 Living. | *Epidemic Diseases. | Rate per 1,000 Living. |
|                            |                      |                        | Deaths.              | Rate per 1,000 Births. | Institu-tions. | Tenements. |                       |                        |                      |                        |                     |                        |
| Manhattan.....             | 148                  | 118.0                  | 9                    | 7.2                    | 4              | 5          | 201                   | 40.1                   | 12                   | 2.4                    | 20                  | 4.0                    |
| The Bronx.....             | 23                   | 76.4                   | 1                    | 3.3                    | ..             | 1          | 39                    | 26.7                   | 3                    | 2.1                    | 7                   | 4.6                    |
| Brooklyn.....              | 76                   | 82.2                   | 12                   | 13.6                   | 8              | 4          | 104                   | 24.3                   | 13                   | 3.1                    | 10                  | 2.3                    |
| Queens.....                | 15                   | 87.7                   | 1                    | 5.8                    | ..             | 1          | 21                    | 23.4                   | 1                    | 1.1                    | 4                   | 4.5                    |
| Richmond.....              | 4                    | 88.9                   | ..                   | ..                     | ..             | ..         | 7                     | 34.6                   | ..                   | ..                     | ..                  | ..                     |
| <b>City of New York...</b> | <b>266</b>           | <b>98.7</b>            | <b>23</b>            | <b>8.5</b>             | <b>12</b>      | <b>11</b>  | <b>472</b>            | <b>39.8</b>            | <b>29</b>            | <b>2.5</b>             | <b>41</b>           | <b>3.5</b>             |

\*Includes Small Pox, Measles, Scarlet Fever, Diphtheria and Whooping Cough.

### Infectious and Contagious Diseases in Hospital.

|                          | Willard Parker Hospital. |              |           |          |            | Riverside Hospital. |              |          |               |          | Kingston Ave. Hospital. |                |              |           |            | Otisville Sanatorium. |            |            |
|--------------------------|--------------------------|--------------|-----------|----------|------------|---------------------|--------------|----------|---------------|----------|-------------------------|----------------|--------------|-----------|------------|-----------------------|------------|------------|
|                          | Scarlet Fever.           | Diph-theria. | Measles.  | Miscel.  | T total.   | Scarlet Fever.      | Diph-theria. | Measles. | Tuber-culosis | Miscel.  | T total.                | Scarlet Fever. | Diph-theria. | Measles.  | Small-pox. |                       | Miscel.    | T total.   |
| Remaining Jan. 23, 1915  | 175                      | 102          | 40        | 5        | 322        | 42                  | 40           | 5        | 253           | 2        | 342                     | 74             | 78           | 32        | ..         | 19                    | 203        | 570        |
| Admitted.....            | 34                       | 47           | 10        | 1        | 92         | 11                  | 13           | 4        | 4             | ..       | 32                      | 31             | 31           | ..        | ..         | 6                     | 82         | 10         |
| Discharged.....          | 17                       | 20           | 12        | 1        | 56         | 3                   | 12           | 1        | 5             | 1        | 21                      | 21             | 21           | ..        | ..         | 6                     | 36         | 12         |
| Died.....                | 3                        | 6            | 1         | ..       | 10         | ..                  | 1            | 1        | 1             | ..       | 4                       | 3              | 3            | ..        | ..         | 1                     | 6          | ..         |
| Remaining Jan. 30, 1915  | 189                      | 117          | 37        | 5        | 348        | 50                  | 38           | 8        | 251           | 2        | 349                     | 103            | 85           | 35        | ..         | 20                    | 243        | 568        |
| <b>Total treated....</b> | <b>209</b>               | <b>149</b>   | <b>50</b> | <b>6</b> | <b>414</b> | <b>53</b>           | <b>53</b>    | <b>9</b> | <b>257</b>    | <b>2</b> | <b>374</b>              | <b>112</b>     | <b>109</b>   | <b>37</b> | <b>..</b>  | <b>27</b>             | <b>285</b> | <b>580</b> |

Figure S22: Weekly Bulletins Vol 1: Sample Page from 1915.



### THE HEALTH DEPARTMENT'S BABY SAVING WORK.

In 1876, owing to an unusually high mortality occurring in infants, the Department of Health obtained a special appropriation for the employment of a staff of physicians during the months of July and August. This staff was known as the "Summer Corps," and the physicians were required to canvass the tenements in the most congested quarters of the City. They treated all sick babies found whose parents were otherwise unable to obtain medical care. This plan was followed each summer for many years.

That it achieved results in the reduction of infant mortality is shown by the decrease in the number of infant deaths during this period, but its efficiency was limited in that the system was directed toward treating sick babies and not primarily toward the prevention of illness.

In 1902 seventeen trained nurses were added to the staff, and were assigned to duty in the work of school medical inspection during the school term, assisting the inspectors of the summer corps during July and August. These nurses instructed mothers in the methods of preparing food for babies, as well as demonstrating proper methods of bathing, clothing, and airing. They also nursed sick babies under the care of the medical inspectors.

With the formation of the Division of Child Hygiene, under the direction of Dr. S. Josephine Baker, in the fall of 1908, a definite and constructive change was made in the department's attitude with regard to the best means to be used in effecting a definite reduction in the infant death rate. The appointment of a staff of 141 nurses for the medical inspection of school children afforded an opportunity of employing these nurses to instruct mothers in proper baby care, not only during the summer months, but also in connection with their school duties during the early spring.

#### Milk Stations Established in 1911.

In 1911 the desire to treat infant mortality as a year-round problem, and to carry out more effectively the policy of preventing disease among babies, was made practically possible by an added appropriation of \$40,000 for the purpose of establishing fifteen infants' milk stations. In addition, the Bureau changed its system of home visiting of babies so as to insure more revisits in each case.

Owing to the successful results obtained in the reduction of infant mortality during 1911, the Department of Health received an added appropriation for 1912 sufficient to establish forty (40) additional infants' milk stations.

For 1916 the Department received an additional appropriation allowing for the establishment of four more stations, making a total of fifty-nine now maintained under its supervision. Some idea of the magnitude of the work performed by the milk stations may be gained from the fact that during 1915 over 46,000 new cases were registered at the Health Department's Stations, the mothers making a total of 1,182,286 visits to the stations. In addition to these, 273,000 home visits were made by physicians, nurses and nurses' assistants.

#### Cases of Infectious and Contagious Diseases Reported.

| Week Ending               | Feb. 5 | Feb. 12 | Feb. 19 | Feb. 26 | Mar. 4 | Mar. 11 | Mar. 18 | Mar. 25 | Apr. 1 | Apr. 8 | Apr. 15 | Apr. 22 | Apr. 29 |
|---------------------------|--------|---------|---------|---------|--------|---------|---------|---------|--------|--------|---------|---------|---------|
| Tuberculosis.....         | 428    | 888     | 428     | 378     | 546    | 456     | 351     | 364     | 385    | 415    | 466     | 409     | 450     |
| Diphtheria and Croup..... | 372    | 328     | 391     | 300     | 316    | 242     | 264     | 347     | 312    | 304    | 373     | 313     | 302     |
| Measles.....              | 345    | 308     | 559     | 503     | 527    | 575     | 696     | 772     | 939    | 932    | 1,045   | 1,019   | 1,086   |
| Scarlet Fever.....        | 188    | 154     | 175     | 173     | 179    | 190     | 208     | 226     | 234    | 194    | 214     | 224     | 177     |
| Chickenpox.....           | 171    | 220     | 194     | 208     | 273    | 259     | 304     | 320     | 398    | 430    | 440     | 279     | 404     |
| Typhoid Fever.....        | 18     | 18      | 21      | 10      | 18     | 12      | 17      | 1       | 1      | 1      | 1       | 1       | 1       |
| Whooping Cough.....       | 104    | 121     | 112     | 143     | 166    | 180     | 169     | 203     | 245    | 268    | 270     | 259     | 280     |
| Syphilia.....             | 382    | 309     | 350     | 363     | 425    | 305     | 350     | 330     | 547    | 391    | 373     | 372     | 439     |
| Gonorrhoea.....           | 134    | 100     | 141     | 90      | 178    | 64      | 76      | 73      | 330    | 65     | 108     | 93      | 249     |

Figure S23: Weekly Bulletins Vol 2: Only Relevant Data Page



DOC.  
N.Y. (CITY)  
RECORDS +  
STATISTICS.

New York (City). Records + Statistics

CITY OF NEW YORK REPORTABLE DISEASES AND CONDITIONS  
BY BOROUGH OF RESIDENCE  
WEEK ENDING JAN 8 1960

TENTATIVE, CORRECTED TO DATE. NOT TO BE USED FOR ANNUAL COMPILATION

|                  | TOTAL | MAN. | BX | BKLYN | QNS. | RICH. | MILITARY |
|------------------|-------|------|----|-------|------|-------|----------|
| AMFRIASIS        | 6     | 3    | 3  |       |      |       |          |
| BACIL DYSENTERY  |       |      |    |       |      |       |          |
| BRUCELLOSIS      |       |      |    |       |      |       |          |
| CHICKENPOX       | 154   | 25   | 27 | 78    | 20   | 4     |          |
| DIARRHEA NEWBORN |       |      |    |       |      |       |          |
| DIPHTHERIA       |       |      |    |       |      |       |          |
| ENCEPHALITIS     |       |      |    |       |      |       |          |
| GERMAN MEASLES   | 33    | 15   | 5  | 11    | 1    | 1     |          |
| HEPATITIS        |       |      |    |       |      |       |          |
| MEASLES          | 423   | 148  | 60 | 212   | 3    |       |          |
| MENINGITIS       |       |      |    |       |      |       |          |
| MENINGOCOCCAL    |       |      |    |       |      |       |          |
| OTH BAC MYCOTIC  |       |      |    |       |      |       |          |
| ASEPTIC          |       |      |    |       |      |       |          |
| MUMPS            | 139   | 45   | 31 | 33    | 28   | 1     | 1        |
| POISONINGS       |       |      |    |       |      |       |          |
| DRUGS CHEM       | 246   | 79   | 39 | 64    | 50   | 14    |          |
| FOOD GROUPS      |       |      |    |       |      |       |          |
| GAS              | 7     |      |    | 6     | 1    |       |          |
| LEAD             | 3     | 1    |    | 2     |      |       |          |
| POLIOMYELITIS    |       |      |    |       |      |       |          |
| PARALYTIC        |       |      |    |       |      |       |          |
| NONPARALYTIC     |       |      |    |       |      |       |          |
| UNSPECIFIED      |       |      |    |       |      |       |          |
| PSITTACOSIS      |       |      |    |       |      |       |          |
| RICKETTSIALPOX   |       |      |    |       |      |       |          |
| SALMONELLOSIS    |       |      |    |       |      |       |          |
| SCARLET FEVER    | 32    | 4    | 4  | 17    | 6    | 1     |          |
| SCHISTOSOMIASIS  | 4     | 2    | 1  | 1     |      |       |          |
| STREP THROAT     |       |      |    |       |      |       |          |
| TETANUS          |       |      |    |       |      |       |          |
| THRUSH NEWBORN   |       |      |    |       |      |       |          |
| TRICHINOSIS      |       |      |    |       |      |       |          |
| TYPHOID FEVER    |       |      |    |       |      |       |          |
| WHOOPING COUGH   | 23    | 4    | 3  | 15    | 1    |       |          |

THE N.Y. ACADEMY  
OF MEDICINE  
JAN 12 1960  
LIBRARY

Figure S24: Health Department Records: Page 1



CITY OF NEW YORK REPORTABLE DISEASES AND CONDITIONS  
 MANHATTAN RESIDENTS BY HEALTH DISTRICT OF RESIDENCE  
 WEEK ENDING JAN 8 1960

TENTATIVE, CORRECTED TO DATE. NOT TO BE USED FOR ANNUAL COMPILATION

|                  | TOTAL | C.H. | E.H. | KB-Y | LES. | LWS. | RIV. | W.H. |
|------------------|-------|------|------|------|------|------|------|------|
| AMEBIASIS        | 3     |      |      | 1    | 1    | 1    |      |      |
| RACIL DYSENTERY  |       |      |      |      |      |      |      |      |
| BRUCELLOSIS      |       |      |      |      |      |      |      |      |
| CHICKENPOX       | 25    | 1    | 11   |      | 2    | 4    | 3    | 4    |
| DIARRHEA NEWBORN |       |      |      |      |      |      |      |      |
| DIPHTHERIA       |       |      |      |      |      |      |      |      |
| ENCEPHALITIS     |       |      |      |      |      |      |      |      |
| GERMAN MEASLES   | 15    | 4    | 1    |      | 1    |      | 4    | 5    |
| HEPATITIS        |       |      |      |      |      |      |      |      |
| MEASLES          | 148   | 76   | 27   | 5    | 7    | 7    | 19   | 7    |
| MENINGITIS       |       |      |      |      |      |      |      |      |
| MENINGOCOCCAL    |       |      |      |      |      |      |      |      |
| OTH BAC MYCOTIC  |       |      |      |      |      |      |      |      |
| ASEPTIC          |       |      |      |      |      |      |      |      |
| MUMPS            | 45    | 6    | 12   | 6    | 1    | 1    | 5    | 14   |
| POISONINGS       |       |      |      |      |      |      |      |      |
| DRUGS CHEM       | 79    | 11   | 10   | 14   | 11   | 12   | 10   | 11   |
| FOOD GROUPS      |       |      |      |      |      |      |      |      |
| GAS              |       |      |      |      |      |      |      |      |
| LEAD             | 1     |      |      |      |      |      | 1    |      |
| POLIOMYELITIS    |       |      |      |      |      |      |      |      |
| PARALYTIC        |       |      |      |      |      |      |      |      |
| NONPARALYTIC     |       |      |      |      |      |      |      |      |
| UNSPECIFIED      |       |      |      |      |      |      |      |      |
| PSITTACOSIS      |       |      |      |      |      |      |      |      |
| RICKETTSIALPOX   |       |      |      |      |      |      |      |      |
| SALMONELLOSIS    |       |      |      |      |      |      |      |      |
| SCARLET FEVER    | 4     |      |      |      | 2    |      |      | 2    |
| SCHISTOSOMIASIS  | 2     |      |      |      | 2    |      |      |      |
| STREP THROAT     |       |      |      |      |      |      |      |      |
| TETANUS          |       |      |      |      |      |      |      |      |
| THRUSH NEWBORN   |       |      |      |      |      |      |      |      |
| TRICHINOSIS      |       |      |      |      |      |      |      |      |
| TYPHOID FEVER    |       |      |      |      |      |      |      |      |
| WHOOPING COUGH   | 4     | 2    |      |      | 1    |      | 1    |      |

Figure S25: Health Department Records: Page 2



CITY OF NEW YORK REPORTABLE DISEASES AND CONDITIONS  
 BRONX RESIDENTS BY HEALTH DISTRICT OF RESIDENCE  
 WEEK ENDING JAN 8 1960

TENTATIVE, CORRECTED TO DATE. NOT TO BE USED FOR ANNUAL COMPILATION

|                  | TOTAL | F.R. | MOR. | M.H. | PEL. | TRE. | WES. |
|------------------|-------|------|------|------|------|------|------|
| AMEBIASIS        | 3     |      | 3    |      |      |      |      |
| BACIL DYSENTERY  |       |      |      |      |      |      |      |
| BRUCELLOSIS      |       |      |      |      |      |      |      |
| CHICKENPOX       | 27    | 7    | 10   | 3    | 3    | 3    | 1    |
| DIARRHEA NEWBORN |       |      |      |      |      |      |      |
| DIPHTHERIA       |       |      |      |      |      |      |      |
| ENCEPHALITIS     |       |      |      |      |      |      |      |
| GERMAN MEASLES   | 5     |      | 2    | 1    |      |      | 2    |
| HEPATITIS        |       |      |      |      |      |      |      |
| MEASLES          | 60    | 1    | 14   | 20   | 6    | 12   | 7    |
| MENINGITIS       |       |      |      |      |      |      |      |
| MENINGOCOCCAL    |       |      |      |      |      |      |      |
| OTH BAC MYCOTIC  |       |      |      |      |      |      |      |
| ASEPTIC          |       |      |      |      |      |      |      |
| MUMPS            | 31    | 9    | 3    | 6    | 2    | 9    | 2    |
| POISONINGS       |       |      |      |      |      |      |      |
| DRUGS CHEM       | 39    | 9    | 7    | 10   | 5    | 7    | 1    |
| FOOD GROUPS      |       |      |      |      |      |      |      |
| GAS              |       |      |      |      |      |      |      |
| LEAD             |       |      |      |      |      |      |      |
| POLIOMYELITIS    |       |      |      |      |      |      |      |
| PARALYTIC        |       |      |      |      |      |      |      |
| NONPARALYTIC     |       |      |      |      |      |      |      |
| UNSPECIFIED      |       |      |      |      |      |      |      |
| PSITTACOSIS      |       |      |      |      |      |      |      |
| RICKETTSIALPOX   |       |      |      |      |      |      |      |
| SALMONELLOSIS    |       |      |      |      |      |      |      |
| SCARLET FEVER    | 4     |      | 1    |      | 1    |      | 2    |
| SCHISTOSOMIASIS  | 1     |      | 1    |      |      |      |      |
| STREP THROAT     |       |      |      |      |      |      |      |
| TETANUS          |       |      |      |      |      |      |      |
| THRUSH NEWBORN   |       |      |      |      |      |      |      |
| TRICHINOSIS      |       |      |      |      |      |      |      |
| TYPHOID FEVER    |       |      |      |      |      |      |      |
| WHOOPING COUGH   | 3     | 1    | 1    |      | 1    |      |      |

2

Figure S26: Health Department Records: Page 3



CITY OF NEW YORK REPORTABLE DISEASES AND CONDITIONS  
 BROOKLYN RESIDENTS BY HEALTH DISTRICT OF RESIDENCE  
 WEEK ENDING JAN 8 1960.

TENTATIVE, CORRECTED TO DATE. NOT TO BE USED FOR ANNUAL COMPILATION

|                  | TOTAL | B.R. | BED. | BRV. | BUSH | FLAT | FT G | GRAV | R.H. | S.P. | W.G. |
|------------------|-------|------|------|------|------|------|------|------|------|------|------|
| AMEBIASIS        |       |      |      |      |      |      |      |      |      |      |      |
| BACIL DYSENTERY  |       |      |      |      |      |      |      |      |      |      |      |
| BRUCELLOSIS      |       |      |      |      |      |      |      |      |      |      |      |
| CHICKENPOX       | 78    | 9    | 10   | 14   | 5    | 8    | 3    | 16   | 3    | 9    | 1    |
| DIARRHEA NEWBORN |       |      |      |      |      |      |      |      |      |      |      |
| DIPHTHERIA       |       |      |      |      |      |      |      |      |      |      |      |
| ENCEPHALITIS     |       |      |      |      |      |      |      |      |      |      |      |
| GERMAN MEASLES   | 11    | 3    | 2    | 5    | 1    |      |      |      |      |      |      |
| HEPATITIS        |       |      |      |      |      |      |      |      |      |      |      |
| MEASLES          | 212   | 2    | 48   | 36   | 9    | 5    | 63   | 1    | 28   | 5    | 15   |
| MENINGITIS       |       |      |      |      |      |      |      |      |      |      |      |
| MENINGOCOCCAL    |       |      |      |      |      |      |      |      |      |      |      |
| OTH BAC MYCOTIC  |       |      |      |      |      |      |      |      |      |      |      |
| ASEPTIC          |       |      |      |      |      |      |      |      |      |      |      |
| MUMPS            | 33    | 2    | 11   | 3    | 1    | 4    |      | 8    | 2    |      | 2    |
| POISONINGS       |       |      |      |      |      |      |      |      |      |      |      |
| DRUGS CHEM       | 64    | 3    | 13   | 8    | 8    | 11   | 8    | 2    | 3    | 4    | 4    |
| FOOD GROUPS      |       |      |      |      |      |      |      |      |      |      |      |
| GAS              | 6     |      | 6    |      |      |      |      |      |      |      |      |
| LEAD             | 2     |      | 1    |      |      |      |      |      |      |      |      |
| POLIOMYELITIS    |       |      |      |      |      |      |      |      | 1    |      |      |
| PARALYTIC        |       |      |      |      |      |      |      |      |      |      |      |
| NONPARALYTIC     |       |      |      |      |      |      |      |      |      |      |      |
| UNSPECIFIED      |       |      |      |      |      |      |      |      |      |      |      |
| PSITTACOSIS      |       |      |      |      |      |      |      |      |      |      |      |
| RICKETTSIALPOX   |       |      |      |      |      |      |      |      |      |      |      |
| SALMONELLOSIS    |       |      |      |      |      |      |      |      |      |      |      |
| SCARLET FEVER    | 17    | 1    | 3    | 4    |      | 7    | 2    |      |      |      |      |
| SCHISTOSOMIASIS  | 1     |      |      |      |      |      |      |      |      |      |      |
| STREP THROAT     |       |      |      |      |      |      |      |      |      |      | 1    |
| TETANUS          |       |      |      |      |      |      |      |      |      |      |      |
| THRUSH NEWBORN   |       |      |      |      |      |      |      |      |      |      |      |
| TRICHINOSIS      |       |      |      |      |      |      |      |      |      |      |      |
| TYPHOID FEVER    |       |      |      |      |      |      |      |      |      |      |      |
| WHOOPING COUGH   | 15    | 1    | 4    | 5    |      |      | 2    | 1    | 2    |      |      |

Figure S27: Health Department Records: Page 4



CITY OF NEW YORK REPORTABLE DISEASES AND CONDITIONS  
 QUEENS RESIDENTS BY HEALTH DISTRICT OF RESIDENCE  
 WEEK ENDING JAN 8 1960

TENTATIVE, CORRECTED TO DATE. NOT TO BE USED FOR ANNUAL COMPILATION

|                  | TOTAL | AST. | COR. | FLU. | J.E. | J.W. | M-F.H. |
|------------------|-------|------|------|------|------|------|--------|
| AMERIASIS        |       |      |      |      |      |      |        |
| BACIL DYSENTERY  |       |      |      |      |      |      |        |
| BRUCELLOSIS      |       |      |      |      |      |      |        |
| CHICKENPOX       | 20    | 5    | 1    | 2    | 4    | 2    | 6      |
| DIARRHEA NEWBORN |       |      |      |      |      |      |        |
| DIPHTHERIA       |       |      |      |      |      |      |        |
| ENCEPHALITIS     |       |      |      |      |      |      |        |
| GERMAN MEASLES   | 1     |      | 1    |      |      |      |        |
| HEPATITIS        |       |      |      |      |      |      |        |
| MEASLES          | 3     | 2    |      |      |      | 1    |        |
| MENINGITIS       |       |      |      |      |      |      |        |
| MENINGOCOCCAL    |       |      |      |      |      |      |        |
| OTH BAC MYCOTIC  |       |      |      |      |      |      |        |
| ASEPTIC          |       |      |      |      |      |      |        |
| MUMPS            | 28    | 5    | 3    | 9    | 1    | 5    | 5      |
| POISONINGS       |       |      |      |      |      |      |        |
| DRUGS CHEM       | 50    | 3    | 4    | 16   | 14   | 7    | 6      |
| FOOD GROUPS      |       |      |      |      |      |      |        |
| GAS              | 1     |      |      |      | 1    |      |        |
| LEAD             |       |      |      |      |      |      |        |
| POLIOMYELITIS    |       |      |      |      |      |      |        |
| PARALYTIC        |       |      |      |      |      |      |        |
| NONPARALYTIC     |       |      |      |      |      |      |        |
| UNSPECIFIED      |       |      |      |      |      |      |        |
| PSITTACOSIS      |       |      |      |      |      |      |        |
| RICKETTSIALPOX   |       |      |      |      |      |      |        |
| SALMONELLOSIS    |       |      |      |      |      |      |        |
| SCARLET FEVER    | 6     |      |      | 3    |      | 2    | 1      |
| SCHISTOSOMIASIS  |       |      |      |      |      |      |        |
| STREP THROAT     |       |      |      |      |      |      |        |
| TETANUS          |       |      |      |      |      |      |        |
| THRUSH NEWBORN   |       |      |      |      |      |      |        |
| TRICHINOSIS      |       |      |      |      |      |      |        |
| TYPHOID FEVER    |       |      |      |      |      |      |        |
| WHOOPING COUGH   | 1     |      |      |      |      |      | 1      |

4

Figure S28: Health Department Records: Page 5

## References

- 1 New York Academy of Medicine. 1216 5th Avenue, New York, NY 10029, United States. [www.nyam.org](http://www.nyam.org).
- 2 New York City Department of Health and Mental Hygiene, Office of Vital Records. Summary of Vital Statistics, 1961-2007 Archived Reports. Available from: <http://www.nyc.gov/html/doh/html/vr/vr-archives.shtml>.
- 3 C. T. Bauch and D. J. D. Earn. Transients and attractors in epidemics. *Proceedings of the Royal Society of London, Series B*, 270(1524):1573–1578, 2003.
- 4 Peter H Baxendale and Priscilla E Greenwood. Sustained oscillations for density dependent Markov processes. *Journal of Mathematical Biology*, 63(3):433–457, 2011.
- 5 B. Cazelles, M. Chavez, G. C. de Magny, J. F. Guegan, and S. Hales. Time-dependent spectral analysis of epidemiological time-series with wavelets. *Journal Of The Royal Society Interface*, 4(15):625–636, 2007.
- 6 Bernard Cazelles, Mario Chavez, Dominique Berteaux, Frédéric Ménard, Jon Olav Vik, Stéphanie Jenouvrier, and Nils C Stenseth. Wavelet analysis of ecological time series. *Oecologia*, 156(2):287–304, 2008.
- 7 D. J. D. Earn. Mathematical epidemiology of infectious diseases. In M. A. Lewis, M. A. J. Chaplain, J. P. Keener, and P. K. Maini, editors, *Mathematical Biology*, volume 14 of *IAS/ Park City Mathematics Series*, pages 151–186. American Mathematical Society, 2009.
- 8 D. He and D. J. D. Earn. Epidemiological effects of seasonal oscillations in birth rates. *Theoretical Population Biology*, 72:274–291, 2007.
- 9 A. M. Holdsworth, N. K. R. Kevlahan, and D. J. D. Earn. Multifractal signatures of infectious diseases. *Journal of the Royal Society Interface*, 9(74):2167–2180, 2012.
- 10 Michael A Johansson, Derek A T Cummings, and Gregory E Glass. Multiyear climate variability and dengue—el nino southern oscillation, weather, and dengue incidence in puerto rico, mexico, and thailand: a longitudinal data analysis. *PLoS Medicine*, 6(11):e1000168, 2009.
- 11 W. London and J. A. Yorke. Recurrent outbreaks of measles, chickenpox and mumps. I. seasonal variation in contact rates. *American Journal of Epidemiology*, 98(6):453–468, 1973.
- 12 C. Torrence and G. P. Compo. A practical guide to wavelet analysis. *Bulletin of American Meteorological Society*, 79(1):61–78. <http://atoc.colorado.edu/research/wavelets/>, 1998.
